# Supplementary material for: [2 + 2] cycloaddition and its photomechanical effects on 1D coordination polymers with reversible amide bonds and coordination site regulation
Source: Royal Society of Chemistry journal article supplement (doi:10.1039/d3sc06098e), 2024-01-01
Supplement: d3sc06098e5.pdf [file d3sc06098e5.pdf]

## Supplementary material

### **[2+2] cycloaddition and its photomechanical effects on 1D coordination polymers with reversible amide bonds and coordination site regulation**

Lei Wang,<sup>a</sup> Si-Bo Qiao,<sup>a</sup> Yan-Ting Chen,<sup>a</sup> Xun Ma,<sup>a</sup> Wei-Ming Wei,<sup>a</sup> Jun Zhang,<sup>b</sup> Lin Du<sup>\*a</sup> and Qi-Hua Zhao<sup>\*a</sup>

<sup>a</sup> Key Laboratory of Medicinal Chemistry for Natural Resource, Ministry of Education and Yunnan Province, Yunnan Characteristic Plant Extraction Laboratory, School of Chemical Science and Technology, School of Pharmacy, Yunnan University, 650500, People's Republic of China.

<sup>b</sup> New Energy Photovoltaic Industry Research Center, Qinghai University, Xining 810016, People's Republic of China.

\* Corresponding author.

E-mail: [qhzhao@ynu.edu.cn](mailto:qhzhao@ynu.edu.cn); [lindu@ynu.edu.cn](mailto:lindu@ynu.edu.cn);

# Contents

|                                                |    |
|------------------------------------------------|----|
| Experimental .....                             | 3  |
| Materials and methods .....                    | 3  |
| Synthesis .....                                | 3  |
| X-ray crystallography .....                    | 7  |
| Simulation details .....                       | 8  |
| Results and Discussion.....                    | 19 |
| Crystal Structures.....                        | 19 |
| PXRD.....                                      | 20 |
| NMR spectra.....                               | 21 |
| Mass spectra.....                              | 29 |
| IR spectra .....                               | 32 |
| Thermo gravimetric analysis (TGA) .....        | 38 |
| Solid-state UV-visible absorbance spectra..... | 39 |
| Scanning electron microscope .....             | 40 |
| Photosolient Effects .....                     | 42 |
| References .....                               | 46 |

## Experimental

### Materials and methods

All reagents and solvents used in the experiments are commercially available and require no further purification. Elemental analysis (C, H, N) was performed using an Elemental Vario ELIII analyzer. The NMR spectroscopy was recorded on the Bruker ADVANCE III HD400 (400 MHz) spectrometer with TMS in DMSO-*d*<sub>6</sub> solution as the internal reference and chemical shifts reported in parts per million (ppm). The mass spectra were recorded on the Agilent LC-MSD TOF mass spectrometer. Infrared (IR) spectra were recorded using KBr particles (4000-400 cm<sup>-1</sup>) on Thermo Fisher Scientific FTIR-Nicolet iS10. All PXRD analyses were performed using the Rigaku TTRIII-18KW automatic diffractometer (Cu K $\alpha$ , 1.5418 Å), scanning from 3° to 55° with a scanning step size of 0.01°. Thermal stability studies were carried out in a nitrogen atmosphere at a heating rate of 10 °C min<sup>-1</sup> on a Mettler-Toledo synchronous thermal analyzer. The morphology and energy dispersion spectroscopy (EDS) data of the composite films were obtained by NovanoSEM 450 field emission scanning electron microscope (SEM) at 10 kV. Uv diffuse reflectance spectroscopy measurements were recorded by Hitachi U-4100 spectrograph, containing an integrating sphere, with BaSO<sub>4</sub> plate as standard (100% reflectivity). Fluorescence measurements were made with a cold light F98 fluorescence spectrophotometer.

### Synthesis

**Synthesis of (2E)-N-3-Pyridinyl-3-(2-thienyl)-2-propenamide (3-ptpa).** First, (E)-3(thiophen-2-yl)acrylic acid (10 mmol, 1.54 g), 30 mL of *N,N*-dimethylformamide and 3 mL of triethylamine were added to a 100 mL round-bottomed flask and stirred until clear. 2-(7-Azabenzotriazol-1-yl)-*N,N,N,N*-tetramethyluronium hexafluorophosphate (HATU 15 mmol, 5.7 g) was added to the above clarified solution and stirred for 3 h. After that, 3-aminopyridine (9 mmol, 0.85 g) was added to the above mixture and stirred for 2 days. Finally, the obtained crude product and anhydrous potassium carbonate (10 mmol, 1.38 g) were added to 300 mL of saturated salt water and stirred for about 30 min. Then, the sample was washed with water and dried in the oven (scheme S1). Yield: 1.79 g (86.2% based on 3-aminopyridine). Anal. Calc. for C<sub>12</sub>H<sub>10</sub>N<sub>2</sub>OS: C, 62.60%; H,

4.35%; N, 12.17%. Found: C, 62.81%; H, 4.24%; N, 12.20%. <sup>1</sup>H-NMR (400 MHz, DMSO-*d*<sub>6</sub>): δ 6.58(1H, d), 7.15(1H, dd), 7.37(1H, dd), 7.47(1H, m), 7.68(1H, dt), 7.78(1H, d), 8.13(1H, ddd), 8.27(1H, dd), 8.81(1H, d), 10.40(1H, s). <sup>13</sup>C-NMR (400 MHz, DMSO-*d*<sub>6</sub>): δ 120.09, 123.70, 126.00, 128.52, 128.74, 131.61, 133.81, 135.92, 139.53, 140.71, 144.21. MS calcd for (C<sub>12</sub>H<sub>10</sub>N<sub>2</sub>OS+H<sup>+</sup>): 231.0514; found: 231.0580. IR (KBr, cm<sup>-1</sup>): 3439(*w*), 3242(*w*), 3182(*w*), 3117(*w*), 2976(*m*), 2911(*m*), 1687(*s*), 1627(*s*), 1608(*m*), 1584(*s*), 1556(*s*), 1475(*m*), 1422(*s*), 1361(*m*), 1323(*s*), 1278(*m*), 1270(*m*), 1244(*w*), 1229(*m*), 1202(*m*), 1164(*m*), 1131(*w*), 1107(*w*), 1077(*w*), 1021(*w*), 987(*m*), 973(*m*), 928(*w*), 858(*m*), 834(*m*), 813(*m*), 790(*w*), 699(*s*), 629(*w*), 615(*w*), 577(*w*), 565(*w*), 485(*w*), 443(*w*).

**Synthesis of (2*E*)-*N*-4-Pyridinyl-3-(2-thienyl)-2-propenamide (4-ptpa).** The conditions for the synthesis of **4-ptpa** were similar to those for the synthesis of **3-ptpa** by replacing 3-aminopyridine with 4-aminopyridine (9 mmol, 0.85 g) (scheme S1). Yield: 1.58 g (75.9% based on 4-aminopyridine). Anal. Calc. for C<sub>12</sub>H<sub>10</sub>N<sub>2</sub>OS: C, 62.60%; H, 4.35%; N, 12.17%. Found: C, 62.74%; H, 4.34%; N, 12.09%. <sup>1</sup>H-NMR (400 MHz, DMSO-*d*<sub>6</sub>): δ 6.57(1H, d), 7.15(1H, dd), 7.49(1H, m), 7.64(2H, m), 7.69(1H, dt), 7.78(1H, d), 8.45(2H, m), 10.56(1H, s). <sup>13</sup>C-NMR (400 MHz, DMSO-*d*<sub>6</sub>): δ 113.70, 120.29, 129.06, 129.54, 132.50, 135.06, 139.91, 146.40, 150.65, 164.76. MS calcd for (C<sub>12</sub>H<sub>10</sub>N<sub>2</sub>OS+H<sup>+</sup>): 231.0514; found: 231.0578. IR (KBr, cm<sup>-1</sup>): 3398(*m*), 3241(*w*), 3160(*w*), 2921(*m*), 1694(*m*), 1625(*s*), 1596(*s*), 1508(*s*), 1420(*m*), 1366(*m*), 1333(*s*), 1274(*m*), 1228(*w*), 1203(*m*), 1159(*s*), 1043(*w*), 1001(*w*), 986(*w*), 965(*w*), 820(*m*), 697(*m*), 564(*m*), 534(*w*), 483(*w*), 442(*w*).

**Synthesis of {[Cd(3-ptpa) (MeOip)·(H<sub>2</sub>O)<sub>2</sub>]·H<sub>2</sub>O}<sub>n</sub> (1).** The concentration of HNO<sub>3</sub> (1 M, 0.1 mL), CdSO<sub>4</sub>·4H<sub>2</sub>O (0.01 mmol, 3 mg), 5-Methoxyisophthalic acid (0.01 mmol, 1.96 mg), **3-ptpa** (0.01 mmol, 2.3 mg) and 1 mL of ACN were successively added into a hard glass tube (15 cm in length and 7 mm in diameter). The sealed glass tube was reacted at 130 °C for 12 h and cooled to ambient temperature at a rate of 3 °C per 60 min to generate yellow block-shaped crystals, which were collected by filtration, washed with H<sub>2</sub>O, and dried in air. Yield: 10.2 mg (86.7%, based on **3-ptpa**). Anal. Calc. for C<sub>21</sub>H<sub>22</sub>N<sub>2</sub>O<sub>9</sub>SCd: C, 42.65%; H, 3.72%; N, 4.73%. Found: C, 42.73%; H, 3.86%; N, 4.66%. <sup>1</sup>H-NMR (400 MHz, DMSO-*d*<sub>6</sub>): δ 3.87(3H, s), 6.58(1H, d), 7.19(1H, dd), 7.55(1H, m), 7.65(2H, d), 7.75(1H, d), 7.88(1H, d), 7.98(1H, dd), 8.08(1H, t), 8.46(1H, ddd), 8.61(1H, dd), 9.30(1H, d), 11.05(1H, s). IR (KBr, cm<sup>-1</sup>): 3298(*s*), 1677(*m*), 1613(*s*), 1540(*s*),

1485(s), 1449(s), 1378(s), 1323(s), 1250(m), 1199(s), 1163(s), 1127(m), 1047(m), 991(w), 963(m), 920(w), 855(w), 808(m), 779(m), 735(m), 703(m), 648(m), 615(m), 564(m), 484(w), 439(w).

**Synthesis of  $[\text{Cd}_2(\text{L}_1)(\text{MeOip})_2(\text{H}_2\text{O})_4]_n$  (**1a**).** Colorless crystals of **1** (0.1 g) were subjected to UV radiation using a UV high-pressure mercury lamp (broad-band) for 12 h to get colorless crystals of **1a** in quantitative yield (scheme S2). Anal. Calc. for  $\text{C}_{42}\text{H}_{40}\text{N}_4\text{O}_{16}\text{S}_2\text{Cd}_2$ : C, 43.99%; H, 3.49%; N, 4.89%. Found: C, 43.67%; H, 3.44%; N, 4.96% (note: the theoretical values from C element analysis have a certain deviation from the actual value due to the small amount of impurities that maybe generated over the photoreaction process).  $^1\text{H-NMR}$  (400 MHz,  $\text{DMSO-}d_6$ ):  $\delta$  3.87(4H, s), 4.24(2H, m), 4.51(2H, m), 6.91(4H, m), 7.32(2H, dd), 7.65(2.6H, d), 8.02(4H, m), 8.08(1.3H, t), 8.66(4H, d), 11.61(2H, d). IR (KBr,  $\text{cm}^{-1}$ ): 3432(m), 3301(m), 3069(m), 1720(m), 1596(s), 1557(s), 1518(s), 1449(m), 1426(m), 1373(s), 1323(m), 1258(m), 1209(m), 1160(m), 1128(m), 1051(m), 1016(w), 920(m), 827(m), 784(m), 726(m), 701(m), 533(w), 440(w).

**Synthesis of  $\{[\text{Cd}_2(\text{4-ptpa})_4(\text{MeOip})_2] \cdot 0.3\text{H}_2\text{O} \cdot 0.8\text{ACN}\}_n$  (**2**).** The conditions for synthesis of **2** were similar to those for synthesis of **1**, and **3-ptpa** was replaced by **4-ptpa** (0.01 mmol, 2.3 mg.). Yield: 27.4 mg (87.2%, based on **4-ptpa**). Anal. Calc. for  $\text{C}_{67.5}\text{H}_{57.8}\text{N}_{8.8}\text{O}_{14.3}\text{S}_4\text{Cd}_2$ : C, 51.51%; H, 3.68%; N, 7.83%. Found: C, 52.01%; H, 3.86%; N, 7.74%.  $^1\text{H-NMR}$  (400 MHz,  $\text{DMSO-}d_6$ ):  $\delta$  3.86(3H, s), 6.62(2H, d), 7.19(2H, dd), 7.58(2H, dd), 7.64(2H, d), 7.77(2H, dt), 7.94(2H, d), 8.09(3H, m), 8.13(2H, d), 8.70(4H, d), 11.58(2H, s). IR (KBr,  $\text{cm}^{-1}$ ): 3332(m), 3162(w), 3070(w), 3000(w), 1701(s), 1611(s), 1566(s), 1513(s), 1449(m), 1426(s), 1367(s), 1333(s), 1318(m), 1277(m), 1258(m), 1233(w), 1207(s), 1158(s), 1051(m), 1019(m), 982(w), 921(w), 893(w), 858(w), 825(m), 798(w), 784(m), 725(m), 703(w), 691(w), 618(w), 571(m), 530(m), 484(w), 448(w).

**Synthesis of  $\{[\text{Cd}_2(\text{L}_3)(\text{MeOip})_2] \cdot \text{H}_2\text{O}\}_n$  (**2a**).** Colorless crystals of **2** (0.1 g) were subjected to UV radiation using a UV high-pressure mercury lamp (broad-band) for 12 h to get colorless crystals of **2a** in quantitative yield (scheme S2). Anal. Calc. for  $\text{C}_{35}\text{H}_{27.5}\text{N}_2\text{O}_{8.3}\text{S}_2\text{Cd}$ : C, 53.53%; H, 3.50%; N, 3.57%. Found: C, 53.19%; H, 3.45%; N, 3.53% (note: the theoretical values from C element analysis have a certain deviation from the actual value due to the small amount of impurities that maybe generated over the photoreaction process).  $^1\text{H-NMR}$  (400 MHz,  $\text{DMSO-}d_6$ ):  $\delta$  3.86(3H, s), 4.23(2H, m), 4.50(2H, m), 6.91(4H, m), 7.31(2H, dd), 7.64(2H, d), 8.00(2H, d), 8.04(3H, m), 8.65(4H, m), 11.60(2H, s). IR (KBr,  $\text{cm}^{-1}$ ): 3288(m), 3069(m), 2990(w), 1721(m), 1613(s), 1597(s), 1555(s), 1518(s), 1449(m), 1426(s), 1374(s), 1329(m), 1258(m), 1212(m), 1158(m), 1126(m),

1052(*m*), 1017(*m*), 919(*w*), 826(*m*), 797(*m*), 725(*m*), 701(*w*), 620(*w*), 532(*w*), 441(*w*).

**Separation of cyclobutanamide dimer L<sub>1</sub>.** Aqueous solutions of **1a** (0.098 mmol, 112.28 mg), Ethylene Diamine Tetraacetic Acid (EDTA 2.5 mmol, 0.9 g) and NaOH (1 M, 40 mL) were added to a 25 mL round-bottomed flask and stirred for 3 days. By centrifugation and ultra-pure water washing, drying in the oven, the separated white powder was cyclobutanamide dimer L<sub>1</sub>. Yield: 32.9 mg (73.1%, based on **1a**). Anal. Calc. for C<sub>24</sub>H<sub>20</sub>N<sub>4</sub>O<sub>2</sub>S<sub>2</sub>: C, 62.61%; H, 4.35%; N, 12.17%. Found: C, 62.81%; H, 4.05%; N, 12.54%. <sup>1</sup>H-NMR (600 MHz, DMSO-*d*<sub>6</sub>): δ 4.01(2H, dd), 4.70(2H, dd), 6.98(4H, m), 7.30(4H, m), 7.78(2H, m), 8.20(2H, d), 8.52(2H, s), 10.22(2H, s). <sup>13</sup>C-NMR (600 MHz, DMSO-*d*<sub>6</sub>): δ 36.64, 50.90, 124.02, 125.27, 125.92, 126.72, 127.36, 135.81, 141.43, 142.21, 144.69, 169.44. MS calcd for (C<sub>24</sub>H<sub>20</sub>N<sub>4</sub>O<sub>2</sub>S<sub>2</sub>+H<sup>+</sup>): 461.1028; found: 461.1094. IR (KBr, cm<sup>-1</sup>): 3249(*w*), 3181(*w*), 3112(*w*), 3052(*w*), 2953(*w*), 1682(*s*), 1584(*m*), 1540(*m*), 1475(*w*), 1421(*s*), 1355(*w*), 1323(*w*), 1287(*m*), 1265(*m*), 1236(*w*), 1195(*w*), 1180(*w*), 1120(*w*), 1046(*w*), 1030(*m*), 908(*m*), 850(*m*), 799(*w*), 700(*s*), 623(*w*), 587(*w*), 557(*s*), 504(*w*).

**Separation of cyclobutanamide dimer L<sub>3</sub>.** The separation method of cyclobutanamide dimer L<sub>3</sub> was similar to that of L<sub>1</sub>, and **1a** was replaced by **2a** (0.098 mmol, 76.89 mg). Yield: 31.8 mg (70.5%, based on **2a**). Anal. Calc. for C<sub>24</sub>H<sub>20</sub>N<sub>4</sub>O<sub>2</sub>S<sub>2</sub>: C, 62.61%; H, 4.35%; N, 12.17%. Found: C, 63.07%; H, 4.66%; N, 12.03%. <sup>1</sup>H-NMR (600 MHz, DMSO-*d*<sub>6</sub>): δ 4.03(2H, d), 4.50(2H, d), 6.88(4H, dt), 7.29(2H, d), 7.44(4H, m), 8.32(4H, m), 10.57(2H, m). <sup>13</sup>C-NMR (600 MHz, DMSO-*d*<sub>6</sub>): δ 48.04, 109.26, 113.66, 125.37, 125.90, 127.09, 142.74, 145.97, 150.65, 170.22. MS calcd for (C<sub>24</sub>H<sub>20</sub>N<sub>4</sub>O<sub>2</sub>S<sub>2</sub>+H<sup>+</sup>): 461.1028; found: 461.1097. IR (KBr, cm<sup>-1</sup>): 3555(*w*), 3287(*m*), 3160(*w*), 3071(*m*), 1686(*m*), 1592(*s*), 1531(*s*), 1416(*m*), 1384(*m*), 1330(*m*), 1294(*m*), 1212(*m*), 1041(*w*), 1000(*w*), 910(*w*), 827(*m*), 692(*m*), 535(*m*), 502(*w*), 452(*w*).

**Separation of cyclobutanil carboxylic acid dimer L<sub>2</sub>.** Cyclobutanamide dimer L<sub>1</sub> (0.1 mmol, 46.0 mg) and HCl (36%, 20 mL) were added to a 50 mL round-bottomed flask, condensed for reflux at 110 °C for 1 day, washed by centrifugation and ultra-pure water, and dried in the oven. The white powder separated was cyclobutanil carboxylic acid dimer L<sub>2</sub>. Yield: 22.0 mg (71.5%, based on L<sub>1</sub>). Anal. Calc. for C<sub>14</sub>H<sub>12</sub>O<sub>4</sub>S<sub>2</sub>: C, 54.54%; H, 3.89%; N, 0.00%. Found: C, 54.98%; H, 3.51%; N, 0.00%. <sup>1</sup>H-NMR (400 MHz, DMSO-*d*<sub>6</sub>): δ 4.01(4H, m), 6.98(4H, m), 7.38(2H, m), 12.43(2H, s). <sup>13</sup>C-NMR (400 MHz, DMSO-*d*<sub>6</sub>): δ 37.04, 37.58, 49.72, 49.77, 50.07, 125.00, 125.21, 125.65, 125.88, 127.14, 127.49, 142.21, 142.24, 171.93, 172.49, 174.00. MS calcd for

(C<sub>14</sub>H<sub>12</sub>O<sub>4</sub>S<sub>2</sub>+Na<sup>+</sup>): 331.0075; found: 331.0063. IR (KBr, cm<sup>-1</sup>): 2911(w), 1694(s), 1425(w), 1296(w), 1233(m), 1043(w), 964(w), 849(w), 705(m), 590(w), 556(w), 517(w).

**Separation of cyclobutanyl carboxylic acid dimer L<sub>4</sub>.** A mixture of **2a** (0.1 mmol, 78.46 mg) and HCl (36%, 25 mL) were added to a 50 mL beamer, stirred at room temperature for 30 minutes, and then pumped and filtered. The filtrate was condensed and returned at 110 °C for 1 day, washed by centrifugation and ultra-pure water, and dried in the oven. The black powder separated was cyclobutanyl carboxylic acid dimer **L<sub>2</sub>**. Yield: 22.9 mg (74.3%, based on **2a**). Anal. Calc. for C<sub>14</sub>H<sub>12</sub>O<sub>4</sub>S<sub>2</sub>: C, 54.54%; H, 3.89%; N, 0.00%. Found: C, 54.46%; H, 3.67%; N, 0.00%. <sup>1</sup>H-NMR (400 MHz, DMSO-*d*<sub>6</sub>): δ 3.70(2H, m), 4.32(2H, m), 6.85(4H, m), 7.24(2H, dd), 12.56(2H, s). <sup>13</sup>C-NMR (400 MHz, DMSO-*d*<sub>6</sub>): δ 41.14, 45.56, 125.32, 125.82, 127.11, 142.45, 173.53. MS calcd for (C<sub>14</sub>H<sub>12</sub>O<sub>4</sub>S<sub>2</sub>+Na<sup>+</sup>): 331.0075; found: 331.0068. IR (KBr, cm<sup>-1</sup>): 3192(w), 1744(s), 1696(m), 1618(w), 1413(m), 1285(w), 1245(m), 1196(m), 1177(m), 1137(w), 1043(w), 848(w), 801(w), 695(m), 598(w), 521(w), 500(w), 480(w), 459(w), 440(w).

**Preparation of artificial photoactuator membrane 1-PVA.** Grind **CP1** with a mortar and pestle to a uniform powder for about 30 minutes. The powder (200 mg) was dispersed in 4 mL ethanol and treated with ultrasonic bath for 5 h. Dry in a vacuum oven at 60 °C to obtain a uniform powder. The 5 g PVA solution (5 wt%) was then mixed with the **CP1** powder and stirred at 70 °C overnight to obtain a uniform solution. The composite film **1-PVA** was obtained by coating the mixture on a glass plate and drying it in an oven at 80 °C.

**Preparation of artificial photoactuator membrane 2-PVA.** The preparation method of the artificial photoactuator film **2-PVA** was similar to that of **1-PVA**, and **CP1** was replaced by **CP2** (200 mg).

### X-ray crystallography

A selected single crystal of suitable size was mounted on a glass capillary tube for X-ray diffraction analysis. Crystallographic data were collected using graphite monochromatic Mo-K $\alpha$  radiation ( $\lambda=0.71073$  Å) and the  $\omega$ -scanning techniques on a Bruker Smart AXS CCD diffractometer<sup>1</sup>. The SADABS program was used to modify the experience absorption. In each case, the structure was solved using the SHELXL software package and the SHELX-2014 program was

refined by the  $F^2$ -based full matrix least square method<sup>2,3</sup>. All non-hydrogen atoms were located in a different Fourier synthesis and finally refined with anisotropic thermal parameters. Table S1 lists the crystallographic data and details of data collection and structure refinement for **1-2a**. Tables S2 and S3 list the selected key lengths and angles for **1-2a**, respectively. CCDC: **1** is 2296093, **2** is 2296091, **2a** is 2296092.

### Simulation details

The data of powder x-ray diffraction were recorded on Bruker D8 advance diffractometer (40 kV, 40 mA) with step of 0.01 degree from 3° to 55° at room temperature, using graphite monochromator and Cu-K $\alpha$  radiation ( $\lambda=1.5418$  Å). The positions of the peaks were picked up from the diffraction pattern excluding the weak peaks agreeing with the reactant, they were further applied to index and yield the unit cell parameters by TOPAS<sup>4,5</sup> program, subsequently an empty cell was constructed according to the enforced unit cell parameters, and the atoms were added to it and refined to find their ideal positions by TD-DFT method using GGA-PBE function. The final structure was checked through comparing the x-ray diffraction pattern between the experimental line and theoretical one (figure S3), their positions matched each other well and revealed the correction for the final structure.

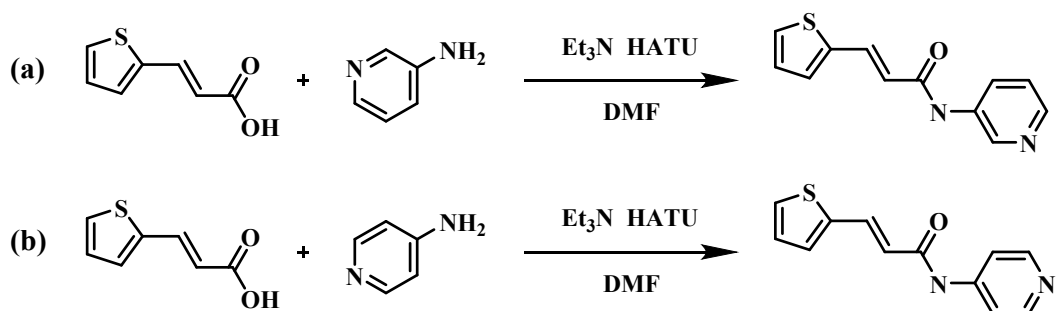

**Scheme S1** Synthesis of **3-ptpa** (a) and **4-ptpa** (b).



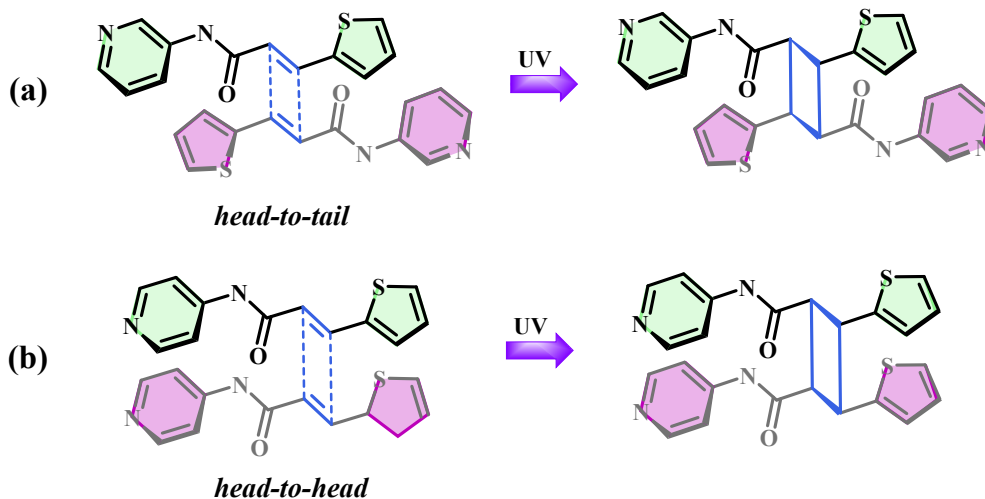

**Scheme S2** The *head-to-tail* arrangement of **3-ptpa** ligands (a) and the *head-to-head* arrangement of **4-ptpa** ligands (b) result in different cycloaddition of cyclobutane derivatives under ultraviolet light.

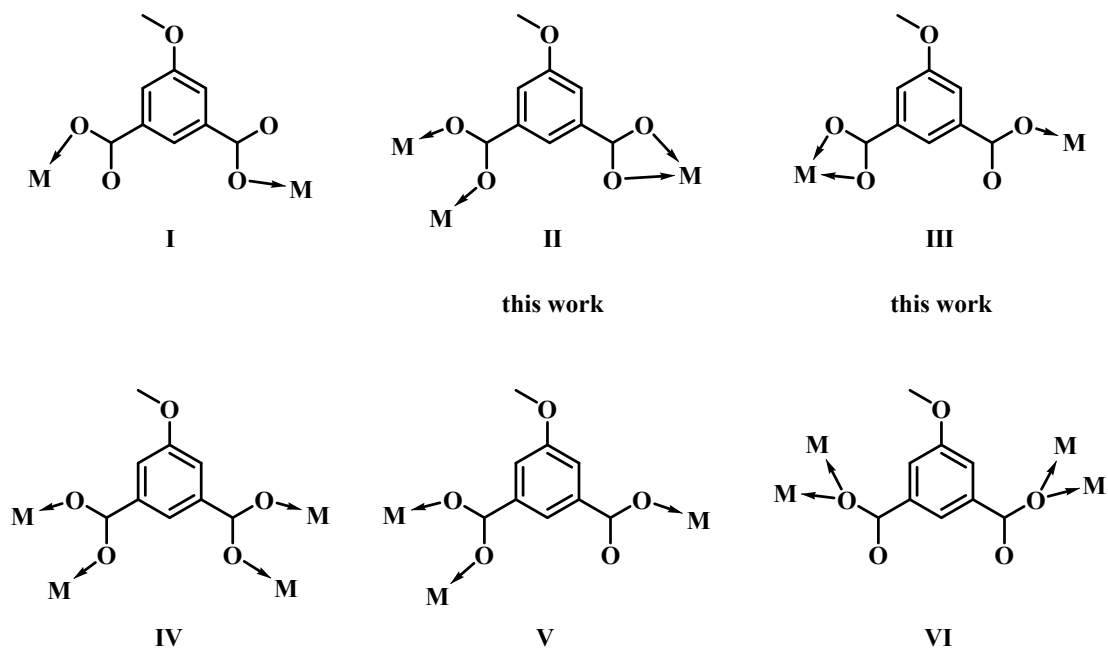

**Scheme S3** Coordination pattern of ligand  $H_2MeOip$ .

**Table S1** Crystallographic data and structure refinement summary for **1-2a**.

| <b>Complex</b>                                  | <b>1</b>                                                                                       | <b>2</b>                                                                                                                                                    | <b>2a</b>                                                                                              |
|-------------------------------------------------|------------------------------------------------------------------------------------------------|-------------------------------------------------------------------------------------------------------------------------------------------------------------|--------------------------------------------------------------------------------------------------------|
| chemical formula                                | C <sub>38</sub> H <sub>36</sub> Cd <sub>2</sub> N <sub>8</sub> Cl <sub>2</sub> SO <sub>8</sub> | C <sub>66</sub> H <sub>52</sub> Cd <sub>2</sub> N <sub>8</sub> O <sub>14</sub> S <sub>4</sub> ·0.75(C <sub>2</sub> H <sub>3</sub> N)·0.25(H <sub>2</sub> O) | C <sub>33</sub> H <sub>26</sub> CdN <sub>4</sub> O <sub>7</sub> S <sub>2</sub> ·1.25(H <sub>2</sub> O) |
| molecular weight                                | 590.86                                                                                         | 1572.51                                                                                                                                                     | 784.61                                                                                                 |
| crystal system                                  | Triclinic                                                                                      | Triclinic                                                                                                                                                   | Triclinic                                                                                              |
| space group                                     | <i>P</i> $\bar{1}$                                                                             | <i>P</i> $\bar{1}$                                                                                                                                          | <i>P</i> $\bar{1}$                                                                                     |
| <i>a</i> (Å)                                    | 10.2530 (4)                                                                                    | 12.5971 (5)                                                                                                                                                 | 10.5185 (18)                                                                                           |
| <i>b</i> (Å)                                    | 10.3656 (5)                                                                                    | 16.0044 (8)                                                                                                                                                 | 10.7250 (18)                                                                                           |
| <i>c</i> (Å)                                    | 12.3264 (6)                                                                                    | 16.5980 (8)                                                                                                                                                 | 14.858 (3)                                                                                             |
| $\alpha$ (deg)                                  | 93                                                                                             | 87.861 (2)                                                                                                                                                  | 93.035 (5)                                                                                             |
| $\beta$ (deg)                                   | 101                                                                                            | 89.132 (1)                                                                                                                                                  | 95.697 (6)                                                                                             |
| $\gamma$ (deg)                                  | 118                                                                                            | 85.016 (2)                                                                                                                                                  | 106.480 (5)                                                                                            |
| <i>V</i> (Å <sup>3</sup> )                      | 1106.38 (9)                                                                                    | 3331.1 (3)                                                                                                                                                  | 1593.6 (5)                                                                                             |
| <i>Z</i>                                        | 2                                                                                              | 2                                                                                                                                                           | 2                                                                                                      |
| <i>D</i> <sub>calcd</sub> (g·cm <sup>-3</sup> ) | 1.774                                                                                          | 1.568                                                                                                                                                       | 1.635                                                                                                  |
| $\mu$ (MoK $\alpha$ ) (mm <sup>-1</sup> )       | 1.139                                                                                          | 0.84                                                                                                                                                        | 0.875                                                                                                  |
| <i>F</i> (000)                                  | 596                                                                                            | 1596                                                                                                                                                        | 795                                                                                                    |
| reflections collected/unique                    | 48654                                                                                          | 125248                                                                                                                                                      | 39230                                                                                                  |
| <i>R</i> <sub>int</sub>                         | 0.040                                                                                          | 0.074                                                                                                                                                       | 0.053                                                                                                  |

|                                 |                |                |                |
|---------------------------------|----------------|----------------|----------------|
| data/restraints/parameters      | 5517/0/313     | 16644/461/923  | 7941/542/526   |
| GOF on $F_2$                    | 1.054          | 1.041          | 1.102          |
| $R_1/wR_2$ [ $I > 2\sigma(I)$ ] | 0.0224, 0.0566 | 0.0459, 0.1055 | 0.0476, 0.1022 |
| $R_1/wR_2$ [all data]           | 0.0254, 0.0581 | 0.0712, 0.1195 | 0.0667, 0.1156 |

$${}^a R_1 = \frac{\sum |F_o| - |F_c|}{\sum |F_o|}, \quad {}^b wR^2 = \frac{[\sum w(F_o^2 - F_c^2)^2]}{\sum w(F_o^2)^2}^{1/2}$$

**Table S2** Selected Bond Distances (Å) and Angles (deg) for **1**.

| <b>1</b>            |            |                     |           |
|---------------------|------------|---------------------|-----------|
| Cd1—O6 <sup>i</sup> | 2.325 (13) | C14—C13             | 1.504 (2) |
| Cd1—O4              | 2.300 (13) | C3—H3               | 0.950     |
| Cd1—O3              | 2.298 (13) | C3—C4               | 1.425 (2) |
| Cd1—O2              | 2.348 (14) | C3—C2               | 1.433 (3) |
| Cd1—O7 <sup>i</sup> | 2.527 (13) | C15—H15             | 0.950     |
| Cd1—N1              | 2.295 (15) | C15—C20             | 1.390 (2) |
| S1—C4               | 1.719 (19) | C18—C17             | 1.503 (2) |
| S1—C1               | 1.702 (2)  | C8—C10              | 1.397 (2) |
| O6—C18              | 1.265 (2)  | C8—C9               | 1.391 (3) |
| O4—C13              | 1.270 (2)  | C19—H19             | 0.950     |
| O3—H3A              | 0.872      | C19—C17             | 1.393 (2) |
| O3—H3B              | 0.871      | C19—C20             | 1.393 (2) |
| O8—C20              | 1.382 (2)  | C10—H10             | 0.950     |
| O8—C21              | 1.442 (2)  | C12—H12             | 0.950     |
| O5—C13              | 1.253 (2)  | C12—C11             | 1.380 (3) |
| O9—H9A              | 0.870      | C5—H5               | 0.950     |
| O9—H9B              | 0.870      | C5—C4               | 1.447 (3) |
| O2—H2A              | 0.872      | C5—C6 <sup>ii</sup> | 3.945 (3) |
| O2—H2B              | 0.872      | C5—C6               | 1.341 (3) |
| O7—C18              | 1.264 (2)  | C11—H11             | 0.950     |
| O1—C7               | 1.223 (2)  | C11—C9              | 1.388 (3) |
| N1—C10              | 1.334 (2)  | C9—H9               | 0.950     |
| N1—C12              | 1.344 (2)  | C21—H21A            | 0.980     |
| N2—H2               | 0.880      | C21—H21B            | 0.980     |
| N2—C8               | 1.401 (2)  | C21—H21C            | 0.980     |
| N2—C7               | 1.370 (2)  | C7—C6               | 1.477 (3) |
| C16—H16             | 0.950      | C1—H1               | 0.950     |
| C16—C14             | 1.393 (2)  | C1—C2               | 1.357 (3) |
| C16—C17             | 1.395 (2)  | C2—H2C              | 0.950     |
| C14—C15             | 1.398 (2)  | C6—H6               | 0.950     |

Symmetry codes: (i)  $1+x, y, z$ .

**Table S3** Selected Bond Distances (Å) and Angles (deg) for **1a**.

| <b>1a</b>           |       |                       |       |
|---------------------|-------|-----------------------|-------|
| Cd1—O4              | 2.023 | C25—H26               | 1.082 |
| Cd1—O8              | 2.017 | C25—C27               | 1.393 |
| Cd1—N12             | 2.120 | C27—H28               | 1.079 |
| Cd1—O90             | 2.571 | C30—C35               | 1.513 |
| Cd1—O92             | 2.601 | C31—H32               | 1.077 |
| Cd1—O3 <sup>i</sup> | 3.143 | C31—C33               | 1.376 |
| S2—C29              | 1.720 | C33—H34               | 1.078 |
| S2—C31              | 1.702 | C35—H36               | 1.110 |
| O4—H5               | 0.990 | C35—C23 <sup>ii</sup> | 1.542 |
| O4—H6               | 0.990 | O90—C98               | 1.350 |
| O8—H9               | 0.990 | O91—C102              | 1.437 |
| O8—H10              | 0.990 | O91—C103              | 1.427 |
| O11—C30             | 1.216 | O92—C98               | 1.343 |
| N12—C19             | 1.363 | C93—H94               | 0.995 |
| N12—C21             | 1.361 | C93—C95               | 1.747 |
| N13—H14             | 1.045 | C93—C101              | 1.762 |
| N13—C17             | 1.448 | C95—C96               | 1.461 |
| N13—C30             | 1.380 | C95—C18               | 1.824 |
| C15—H16             | 1.083 | C96—H97               | 1.054 |
| C15—C29             | 1.377 | C96—C102              | 1.480 |
| C15—C33             | 1.362 | C98—C101              | 1.851 |
| C17—C19             | 1.410 | C99—H100              | 1.030 |
| C17—C27             | 1.407 | C99—C101              | 1.443 |
| C19—H20             | 1.080 | C99—C102              | 1.505 |
| C21—H22             | 1.080 | C103—H104             | 1.111 |
| C21—C25             | 1.393 | C103—H105             | 1.109 |
| C23—H24             | 1.115 | C103—H106             | 1.111 |
| C23—C29             | 1.507 | O3—C18                | 1.506 |
| C23—C35             | 1.540 | O3—Cd1 <sup>iii</sup> | 3.143 |

|                       |       |        |       |
|-----------------------|-------|--------|-------|
| C23—C35 <sup>ii</sup> | 1.542 | O7—C18 | 1.269 |
|-----------------------|-------|--------|-------|

Symmetry codes: (i)  $x-1, y, z$ ; (ii)  $-x, -y+1, -z+1$ ; (iii)  $x+1, y, z$ .

**Table S4** Selected Bond Distances (Å) and Angles (deg) for **2**.

| <b>2</b>              |           |         |           |
|-----------------------|-----------|---------|-----------|
| Cd1—O1                | 2.341 (2) | C38—C42 | 1.391 (5) |
| Cd1—O4 <sup>i</sup>   | 2.397 (2) | C40—C56 | 1.393 (5) |
| Cd1—O12 <sup>i</sup>  | 2.448 (2) | C40—C58 | 1.389 (5) |
| Cd1—O14               | 2.335 (2) | C44—H44 | 0.950     |
| Cd1—N1                | 2.276 (3) | C50—H50 | 0.950     |
| Cd1—N4                | 2.279 (3) | C50—C58 | 1.385 (5) |
| Cd2—O6                | 2.295 (2) | C52—C11 | 1.472 (5) |
| Cd2—O8 <sup>ii</sup>  | 2.338 (2) | C54—H54 | 0.950     |
| Cd2—O10               | 2.276 (2) | C54—C56 | 1.380 (5) |
| Cd2—O7 <sup>ii</sup>  | 2.460 (2) | C56—H56 | 0.950     |
| Cd2—N6                | 2.303 (3) | C58—H58 | 0.950     |
| Cd2—N8                | 2.300 (3) | C60—H60 | 0.950     |
| Cd2—C48 <sup>ii</sup> | 2.752 (3) | C60—C3  | 1.392 (6) |
| S1—C19                | 1.737 (4) | C60—C13 | 1.374 (5) |
| S1—C61                | 1.721 (5) | C62—H62 | 0.950     |
| S4—C43                | 1.700 (5) | C62—C5  | 1.378 (6) |
| S4—C2                 | 1.712 (6) | C64—C66 | 1.467 (5) |
| S2—C13                | 1.751 (4) | C66—H66 | 0.950     |
| S2—C63                | 1.717 (7) | C66—C17 | 1.335 (5) |
| S3—C53                | 1.724 (4) | C33—H33 | 0.950     |
| S3—C65                | 1.716 (6) | C33—C39 | 1.470 (5) |
| O1—C18                | 1.253 (4) | C33—C23 | 1.342 (5) |
| O4—C20                | 1.268 (4) | C17—H17 | 0.950     |
| O6—C18                | 1.261 (4) | C17—C53 | 1.441 (5) |
| O8—C48                | 1.276 (4) | C35—C45 | 1.476 (5) |
| O10—C14               | 1.259 (4) | C9—H9   | 0.950     |
| O12—C20               | 1.248 (4) | C9—C43  | 1.432 (5) |
| O14—C14               | 1.256 (4) | C9—C45  | 1.340 (5) |

|         |           |          |           |
|---------|-----------|----------|-----------|
| O7—C48  | 1.250 (4) | C37—H37  | 0.950     |
| O2—C46  | 1.372 (4) | C37—C11  | 1.341 (5) |
| O2—C25  | 1.418 (5) | C37—C13  | 1.440 (5) |
| O9—C42  | 1.375 (4) | C19—C23  | 1.444 (6) |
| O9—C57  | 1.433 (5) | C19—C47  | 1.374 (6) |
| N1—C51  | 1.307 (5) | C5—H5A   | 0.950     |
| N1—C27  | 1.305 (5) | C41—H41  | 0.950     |
| N4—C16  | 1.343 (4) | C41—C21  | 1.385 (6) |
| N4—C36  | 1.343 (4) | C21—H21  | 0.950     |
| O5—C52  | 1.218 (4) | C43—C55  | 1.385 (6) |
| N6—C62  | 1.324 (5) | C11—H11  | 0.950     |
| N6—C41  | 1.327 (5) | C45—H45  | 0.950     |
| O11—C64 | 1.222 (4) | C23—H23  | 0.950     |
| N8—C50  | 1.338 (5) | C47—H47  | 0.950     |
| N8—C54  | 1.339 (5) | C47—C29  | 1.389 (7) |
| O3—C39  | 1.221 (4) | C3—H3A   | 0.950     |
| N2—H2   | 0.880     | C3—H3B   | 0.950     |
| N2—C22  | 1.389 (4) | C3—C63   | 1.385 (8) |
| N2—C64  | 1.371 (4) | C3—C63A  | 1.340 (2) |
| C1—H1   | 0.950     | C49—H49  | 0.950     |
| C1—C6   | 1.400 (4) | C49—C53  | 1.361 (6) |
| C1—C12  | 1.391 (4) | C49—C15  | 1.397 (6) |
| C4—H4   | 0.950     | C25—H25A | 0.980     |
| C4—C8   | 1.393 (5) | C25—H25B | 0.980     |
| C4—C10  | 1.403 (4) | C25—H25C | 0.980     |
| N5—H5   | 0.880     | C51—H51  | 0.950     |
| N5—C32  | 1.386 (5) | C51—C7   | 1.389 (6) |
| N5—C39  | 1.370 (5) | C13—S2A  | 1.728 (6) |
| N3—H3   | 0.880     | C53—S3A  | 1.865 (7) |
| N3—C40  | 1.386 (5) | C27—H27  | 0.950     |
| N3—C52  | 1.390 (5) | C27—C59  | 1.382 (6) |
| C6—C20  | 1.501 (4) | C55—H55  | 0.950     |

|         |           |           |           |
|---------|-----------|-----------|-----------|
| C6—C38  | 1.388 (5) | C55—C31   | 1.357 (7) |
| O13—C35 | 1.216 (4) | C7—H7A    | 0.950     |
| C8—C18  | 1.513 (4) | C57—H57A  | 0.980     |
| C8—C26  | 1.395 (5) | C57—H57B  | 0.980     |
| N7—H7   | 0.880     | C57—H57C  | 0.980     |
| N7—C30  | 1.388 (4) | C29—H29   | 0.950     |
| N7—C35  | 1.387 (4) | C29—C61   | 1.366 (8) |
| C10—C28 | 1.384 (5) | C59—H59   | 0.950     |
| C10—C48 | 1.499 (4) | C15—H15   | 0.950     |
| C12—C14 | 1.508 (4) | C15—H15A  | 0.950     |
| C12—C34 | 1.398 (5) | C15—C65   | 1.346 (8) |
| C16—H16 | 0.950     | C15—C65A  | 1.450 (2) |
| C16—C24 | 1.374 (5) | C61—H61   | 0.950     |
| C22—C24 | 1.390 (5) | C31—H31   | 0.950     |
| C22—C44 | 1.398 (4) | C31—C2    | 1.340 (9) |
| C24—H24 | 0.950     | C63—H63   | 0.950     |
| C26—H26 | 0.950     | C2—H2A    | 0.950     |
| C26—C46 | 1.391 (4) | C65—H65   | 0.950     |
| C28—H28 | 0.950     | S3A—C65A  | 1.790 (2) |
| C28—C46 | 1.387 (5) | C65A—H65A | 0.950     |
| C30—C7  | 1.360 (5) | C63A—H63A | 0.950     |
| C30—C59 | 1.359 (6) | C63A—S2A  | 1.760 (2) |
| C32—C5  | 1.381 (5) | C69—N68   | 1.162 (9) |
| C32—C21 | 1.375 (5) | C69—C67   | 1.421 (9) |
| C34—H34 | 0.950     | C67—H67A  | 0.980     |
| C34—C42 | 1.389 (4) | C67—H67B  | 0.980     |
| C36—H36 | 0.950     | C67—H67C  | 0.980     |
| C36—C44 | 1.385 (5) | O67A—H67D | 0.870     |
| C38—H38 | 0.950     | O67A—H67E | 0.870     |

Symmetry codes: (i) 1-x, 1-y, -z; (ii) -x, 1-y, 1-z.

**Table S5** Selected Bond Distances (Å) and Angles (deg) for **2a**.

|           |
|-----------|
| <b>2a</b> |
|-----------|



|                      |            |          |            |
|----------------------|------------|----------|------------|
| Cd1—O4               | 2.306 (3)  | C13—C10  | 1.378 (6)  |
| Cd1—O2 <sup>i</sup>  | 2.356 (3)  | C12—H12  | 0.950      |
| Cd1—O3 <sup>i</sup>  | 2.500 (3)  | C12—C11  | 1.379 (5)  |
| Cd1—O5 <sup>ii</sup> | 2.321 (3)  | C10—H10  | 0.950      |
| Cd1—N2 <sup>ii</sup> | 2.306 (3)  | C16—C17  | 1.516 (5)  |
| Cd1—N1               | 2.279 (3)  | C33—H33  | 0.950      |
| S1—C19               | 1.722 (8)  | C33—C32  | 1.391 (5)  |
| S1—C22               | 1.736 (6)  | C27—H27  | 1.000      |
| S2—C26               | 1.639 (6)  | C27—C26  | 1.495 (6)  |
| S2—C25               | 1.709 (13) | C27—C18  | 1.579 (6)  |
| C23—H23              | 0.950      | C27—C28  | 1.550 (5)  |
| C23—C26              | 1.421 (17) | C32—H32  | 0.950      |
| C23—C24              | 1.410 (2)  | C11—H11  | 0.950      |
| O4—C9                | 1.263 (4)  | C26—S2A  | 1.681 (6)  |
| O2—C8                | 1.278 (4)  | C26—C23A | 1.437 (19) |
| O1—C3                | 1.375 (4)  | C19—C18  | 1.487 (6)  |
| O1—C1                | 1.430 (5)  | C29—C28  | 1.521 (5)  |
| O3—C8                | 1.240 (4)  | C18—H18  | 1.000      |
| O5—C9                | 1.252 (5)  | C18—H18A | 1.000      |
| N2—C34               | 1.350 (5)  | C18—C17  | 1.552 (5)  |
| N2—C33               | 1.343 (5)  | C18—C19A | 1.488 (15) |
| N3—H3                | 0.880      | C17—H17  | 1.000      |
| N3—C14               | 1.407 (5)  | C17—C28  | 1.591 (6)  |
| N3—C16               | 1.377 (5)  | C28—H28  | 1.000      |
| N1—C10               | 1.339 (5)  | C22—H22  | 0.950      |
| N1—C11               | 1.338 (5)  | C22—C21  | 1.352 (8)  |
| O7—C29               | 1.211 (5)  | C1—H1A   | 0.980      |
| N4—H4                | 0.880      | C1—H1B   | 0.980      |
| N4—C31               | 1.394 (5)  | C1—H1C   | 0.980      |
| N4—C29               | 1.373 (5)  | C21—H21  | 0.950      |
| O6—C16               | 1.219 (5)  | C25—H25  | 0.950      |
| C20—H20              | 0.950      | C25—C24  | 1.344 (12) |

|         |            |           |            |
|---------|------------|-----------|------------|
| C20—C19 | 1.321 (12) | C24—H24   | 0.950      |
| C20—C21 | 1.396 (13) | S2A—C25A  | 1.686 (16) |
| C6—H6   | 0.950      | C23A—H23A | 0.950      |
| C6—C5   | 1.395 (5)  | C23A—C24A | 1.530 (3)  |
| C6—C7   | 1.397 (5)  | C25A—H25A | 0.950      |
| C5—C4   | 1.405 (5)  | C25A—C24A | 1.344 (14) |
| C5—C9   | 1.518 (5)  | C24A—H24A | 0.950      |
| C7—C2   | 1.389 (5)  | O8—H8A    | 0.870      |
| C7—C8   | 1.507 (5)  | O8—H8B    | 0.870      |
| C4—H4A  | 0.950      | O8—O9     | 1.318 (14) |
| C4—C3   | 1.383 (5)  | O9—H9A    | 0.870      |
| C2—H2   | 0.950      | O9—H9B    | 0.870      |
| C2—C3   | 1.397 (5)  | S1A—C19A  | 1.72 (2)   |
| C31—C35 | 1.399 (5)  | S1A—C22A  | 1.727 (18) |
| C31—C32 | 1.399 (5)  | C20A—H20A | 0.950      |
| C35—H35 | 0.950      | C20A—C19A | 1.32 (2)   |
| C35—C34 | 1.378 (5)  | C20A—C21A | 1.42 (2)   |
| C14—C13 | 1.389 (5)  | C22A—H22A | 0.950      |
| C14—C12 | 1.395 (5)  | C22A—C21A | 1.350 (18) |
| C34—H34 | 0.950      | C21A—H21A | 0.950      |
| C13—H13 | 0.950      |           |            |

Symmetry codes: (i) 1-x, y, z; (ii) 1-x, -y, -z.

## Results and Discussion

### Crystal Structures

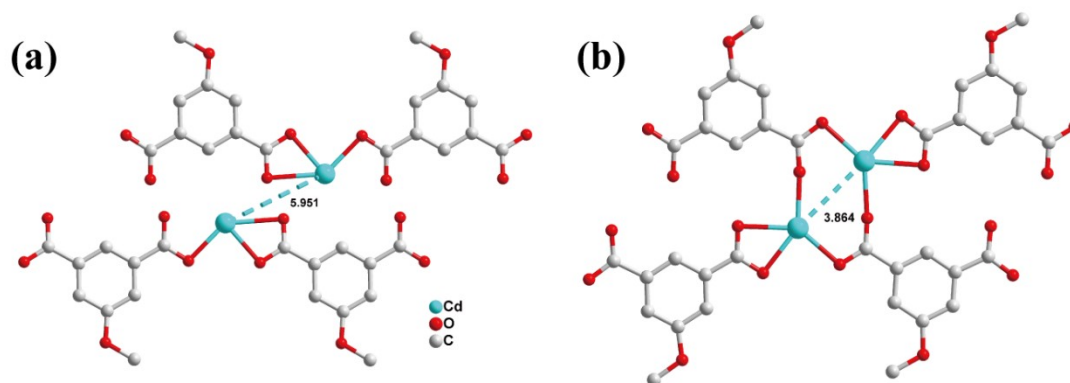

Fig. S1 Cd...Cd distance and component of the 1D carboxyl chain in **1** (a) and **2** (b).

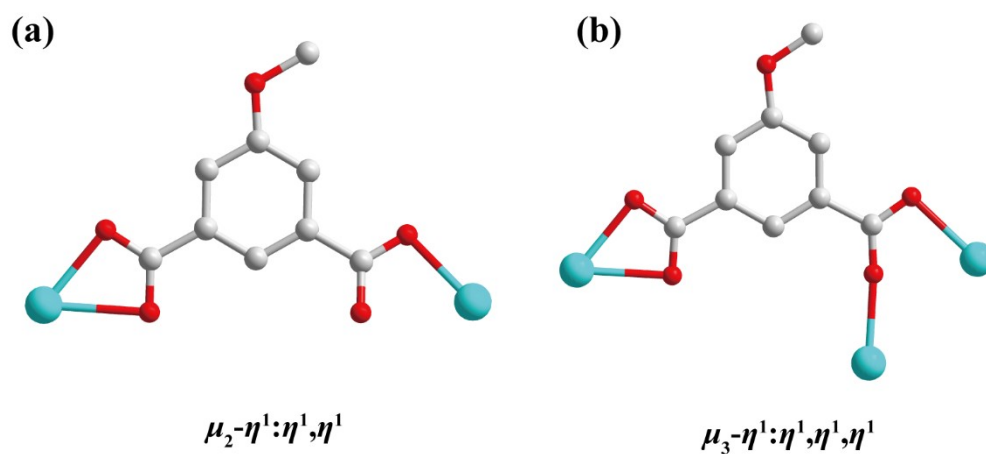

Fig. S2 Coordination modes of the carboxyl ligands in **1** (a) and **2** (b).

PXRD

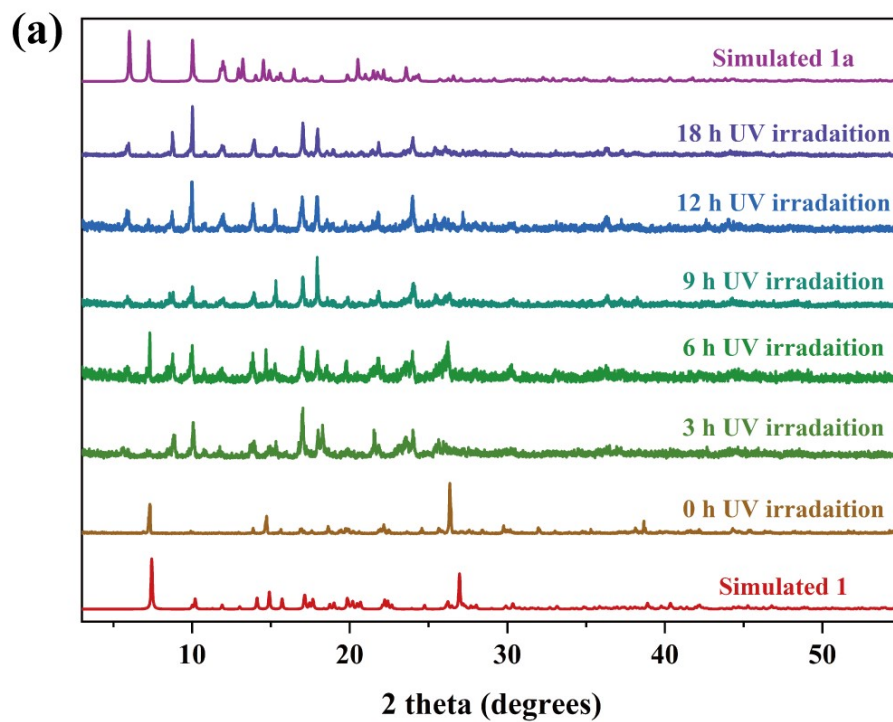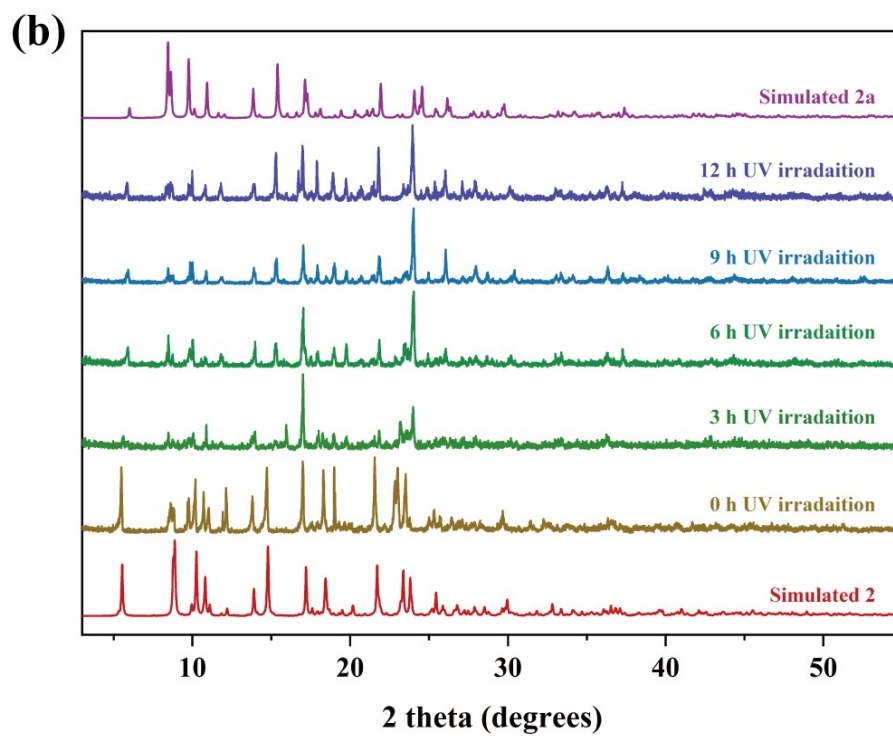

Fig. S3 PXRD patterns of 1–2a.

## NMR spectra

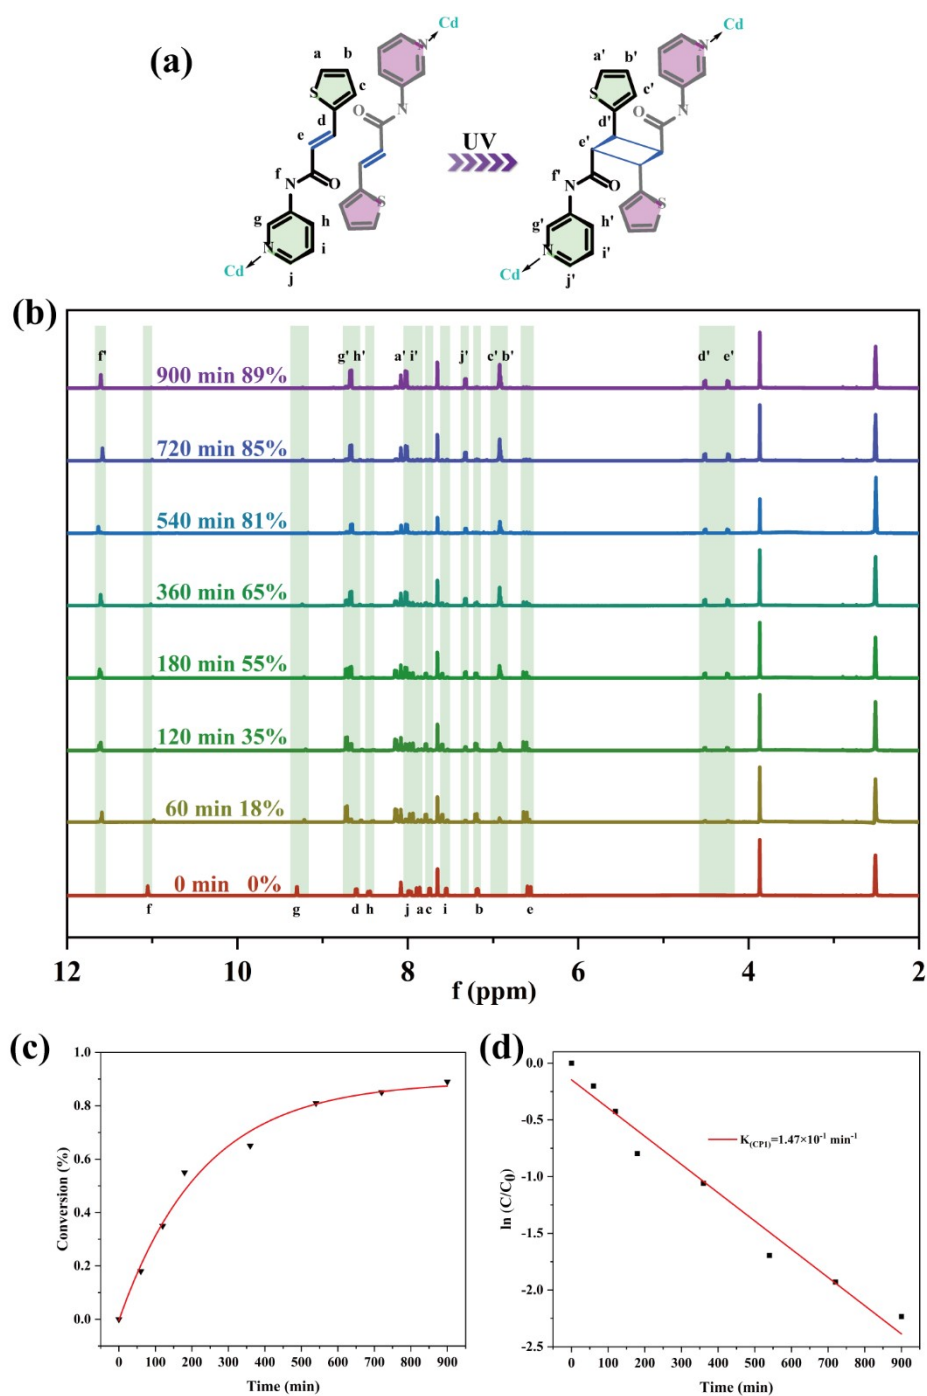

**Fig. S4** The  $^1\text{H}$ -NMR spectra of **1** after UV light ( $\lambda = 365$  nm) irradiation at 298 K (b) for different time (400 MHz,  $\text{DMSO-}d_6$ ) and the alignment of **3-ptpa** ligands before and after the photocycloaddition reaction (a). Plots of conversion of **3-ptpa** in **1** versus irradiation time based on  $^1\text{H}$ -NMR result (c) and corresponding fitting of kinetic rate at 298 K of **1** (d).

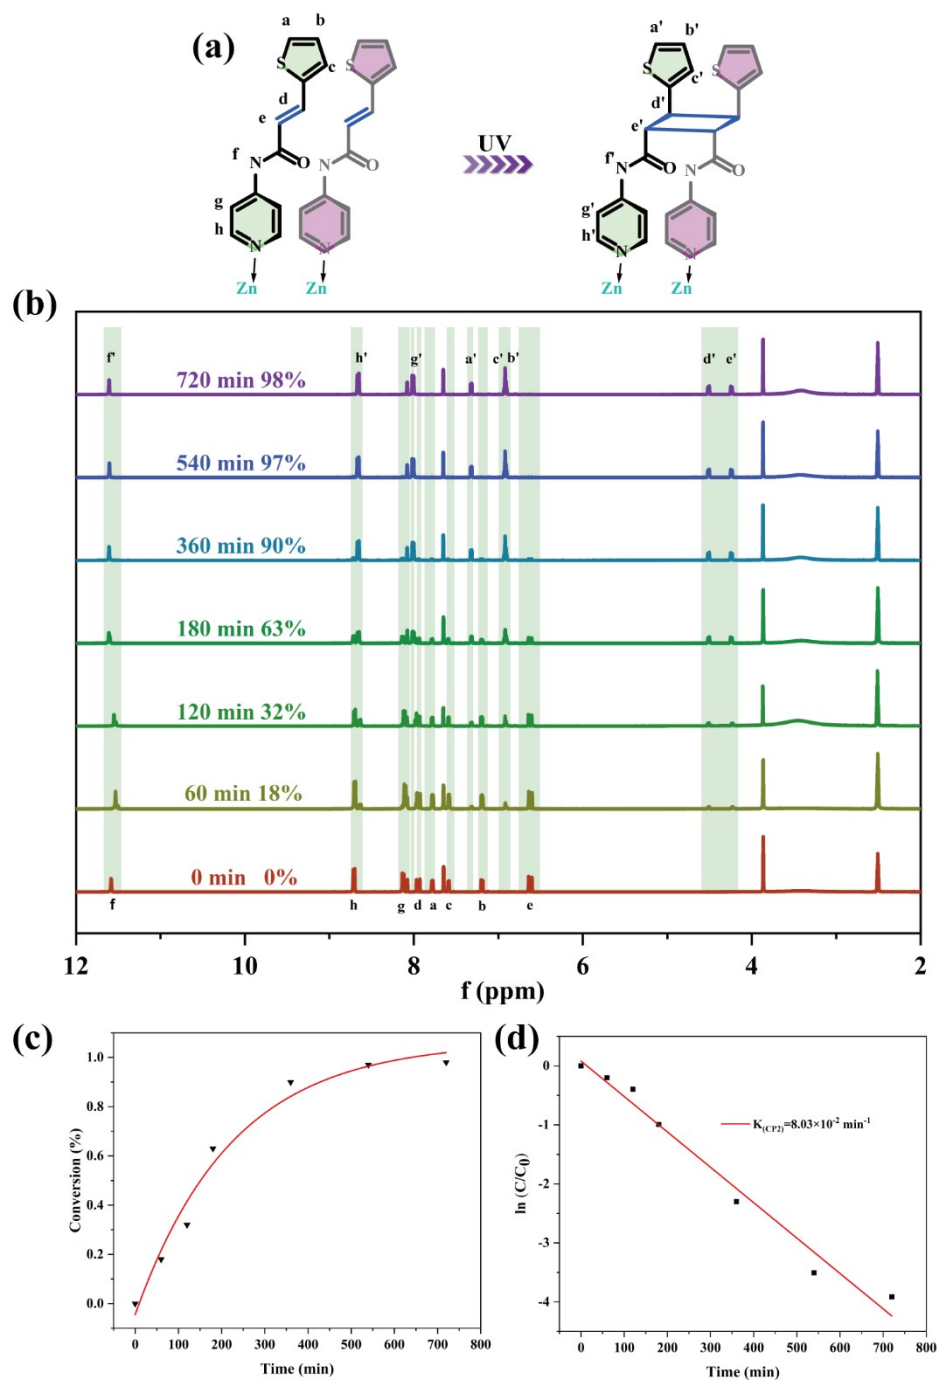

**Fig. S5** The  $^1\text{H-NMR}$  spectra of **2** after UV light ( $\lambda = 365 \text{ nm}$ ) irradiation at 298 K (b) for different time (400 MHz,  $\text{DMSO-}d_6$ ) and the alignment of **4-ptpa** ligands before and after the photocycloaddition reaction (a). Plots of conversion of **4-ptpa** in **2** versus irradiation time based on  $^1\text{H-NMR}$  result (c) and corresponding fitting of kinetic rate at 298 K of **2** (d).

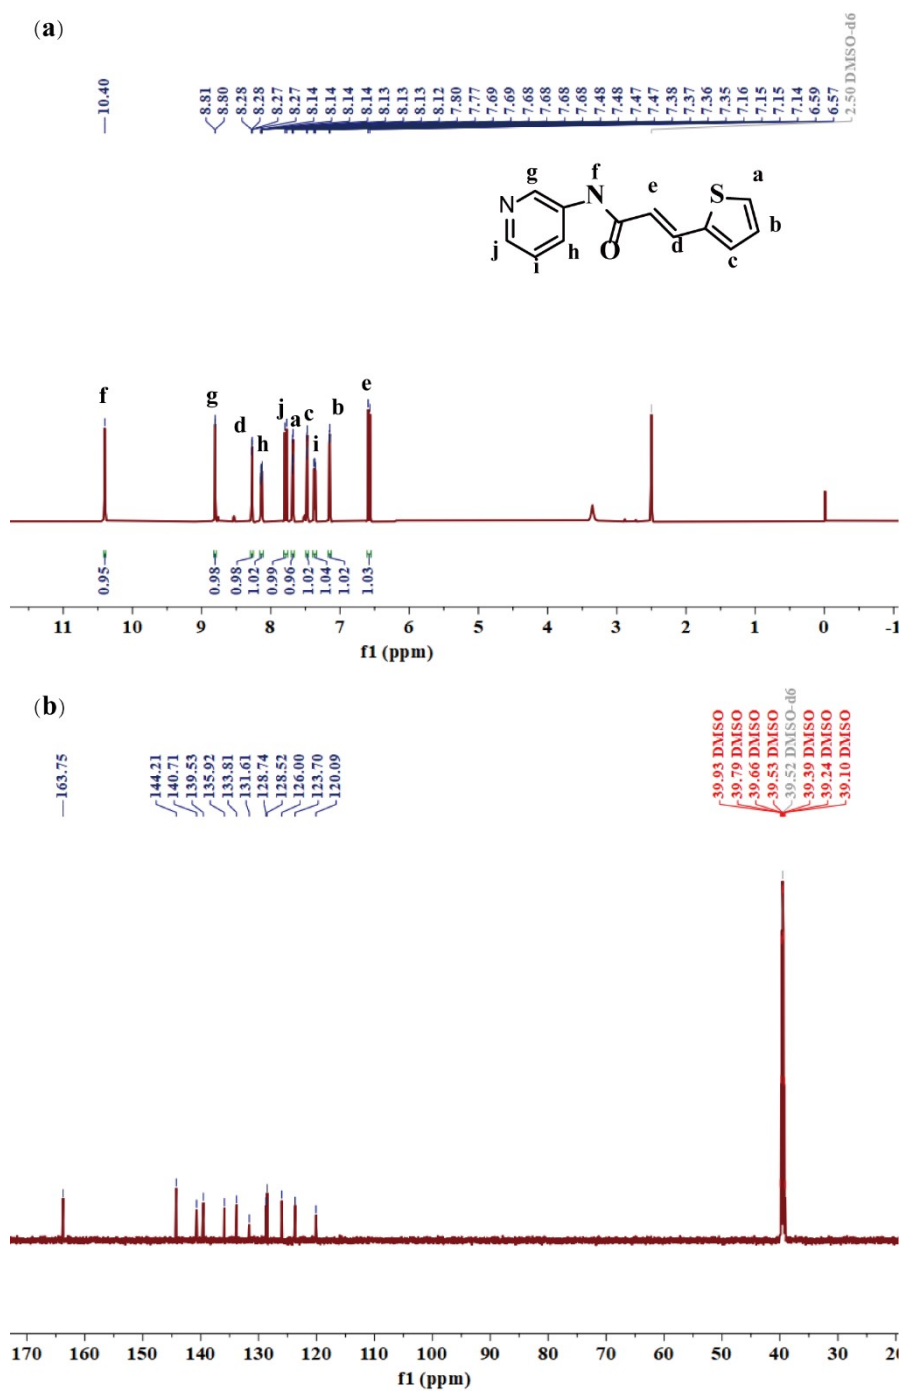

Fig. S6  $^1\text{H}$ -NMR spectrum (a) and  $^{13}\text{C}$ -NMR spectrum (b) of **3-ptpa** in  $\text{DMSO-}d_6$ .

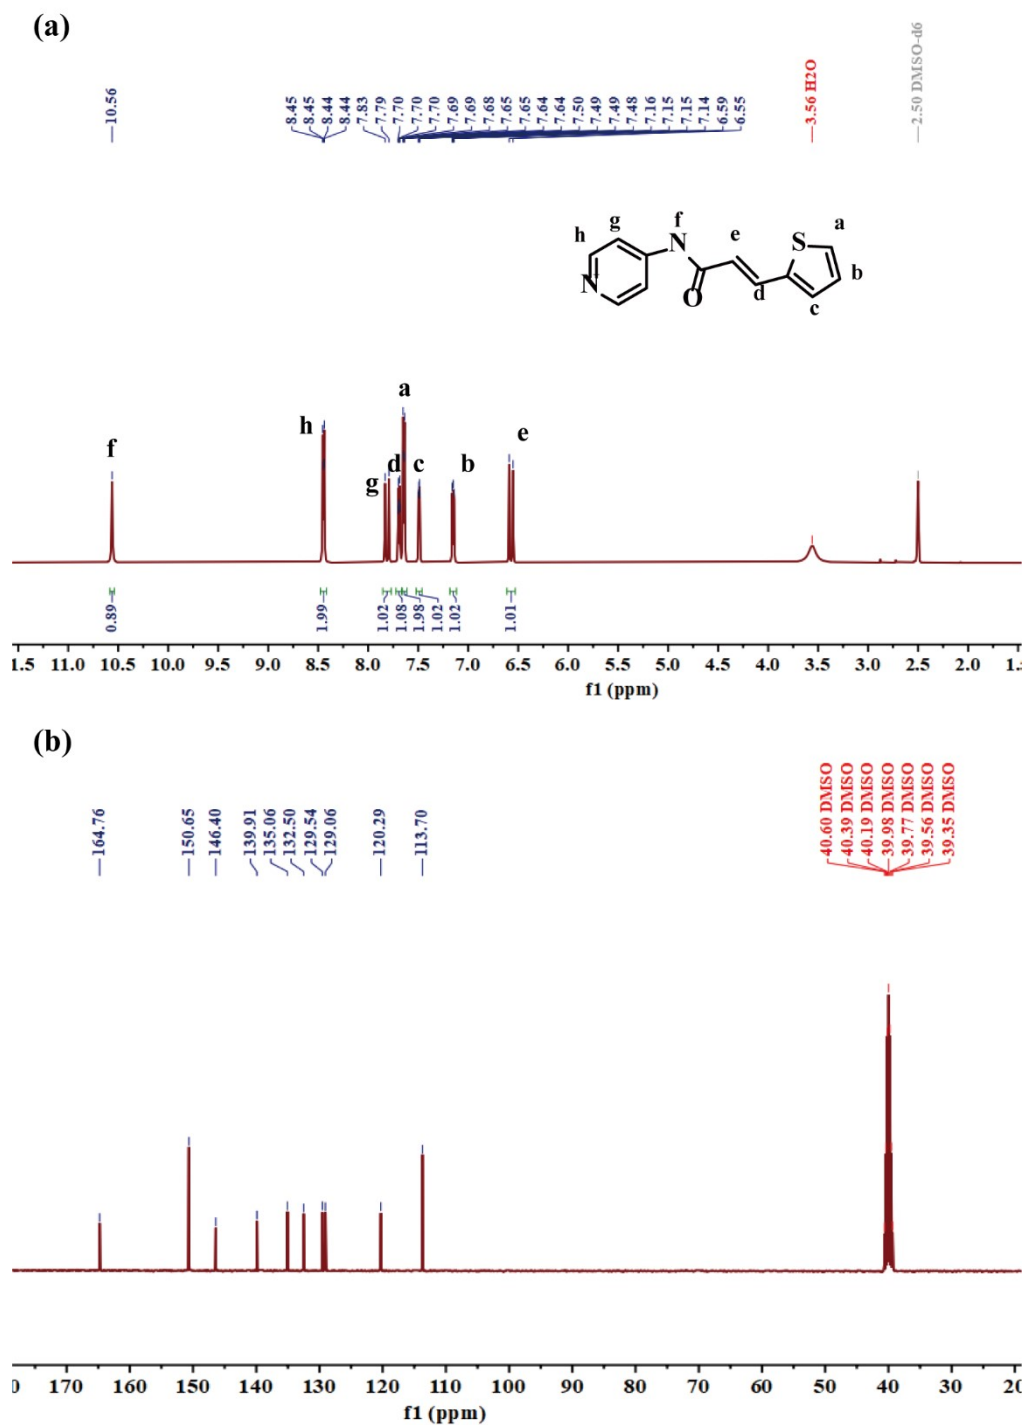

Fig. S7  $^1\text{H}$ -NMR spectrum (a) and  $^{13}\text{C}$ -NMR spectrum (b) of **4-ptpa** in  $\text{DMSO-}d_6$ .



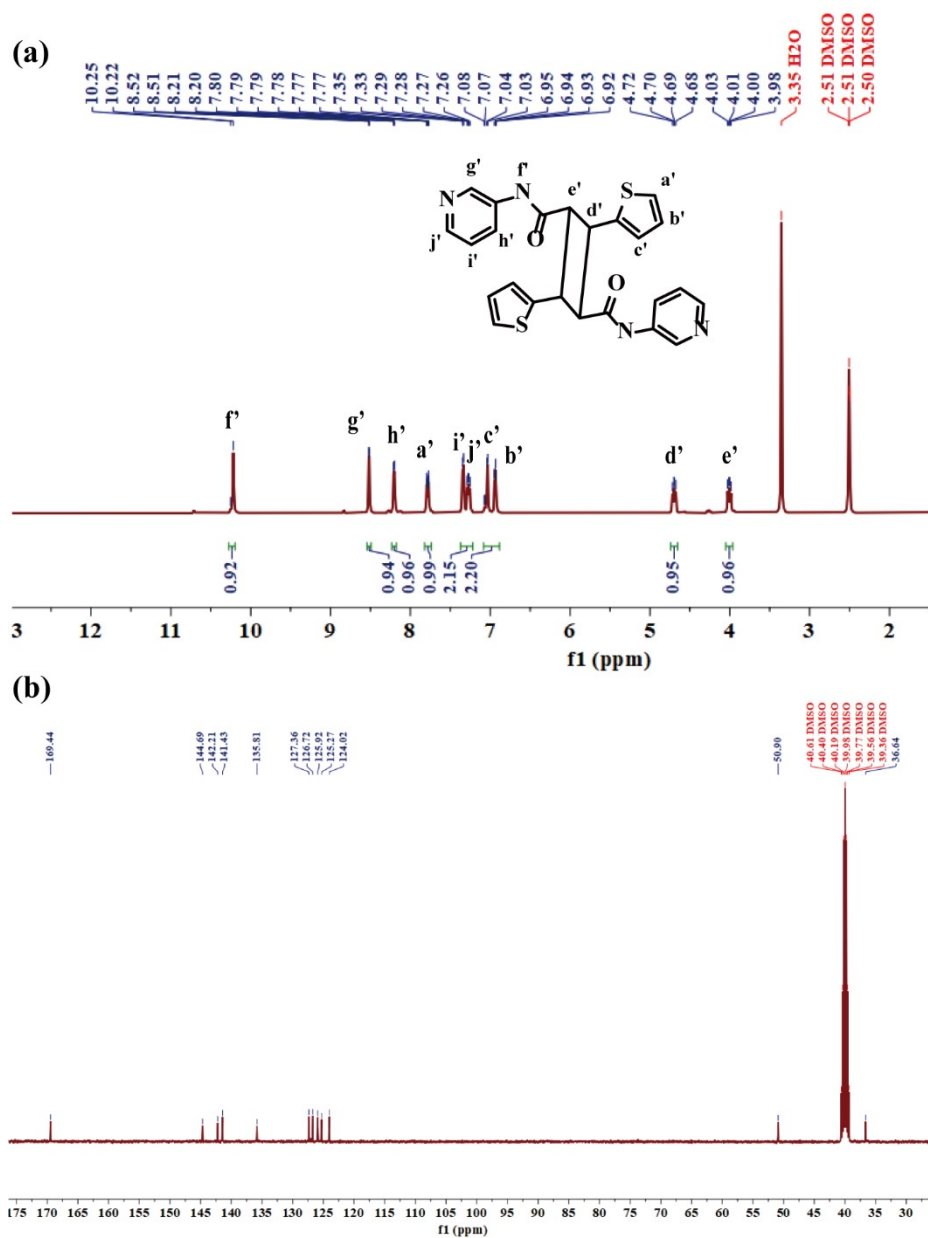

**Fig. S8**  $^1\text{H}$ -NMR spectrum (a) and  $^{13}\text{C}$ -NMR spectrum (b) of  $\text{L}_1$  in  $\text{DMSO-}d_6$ .

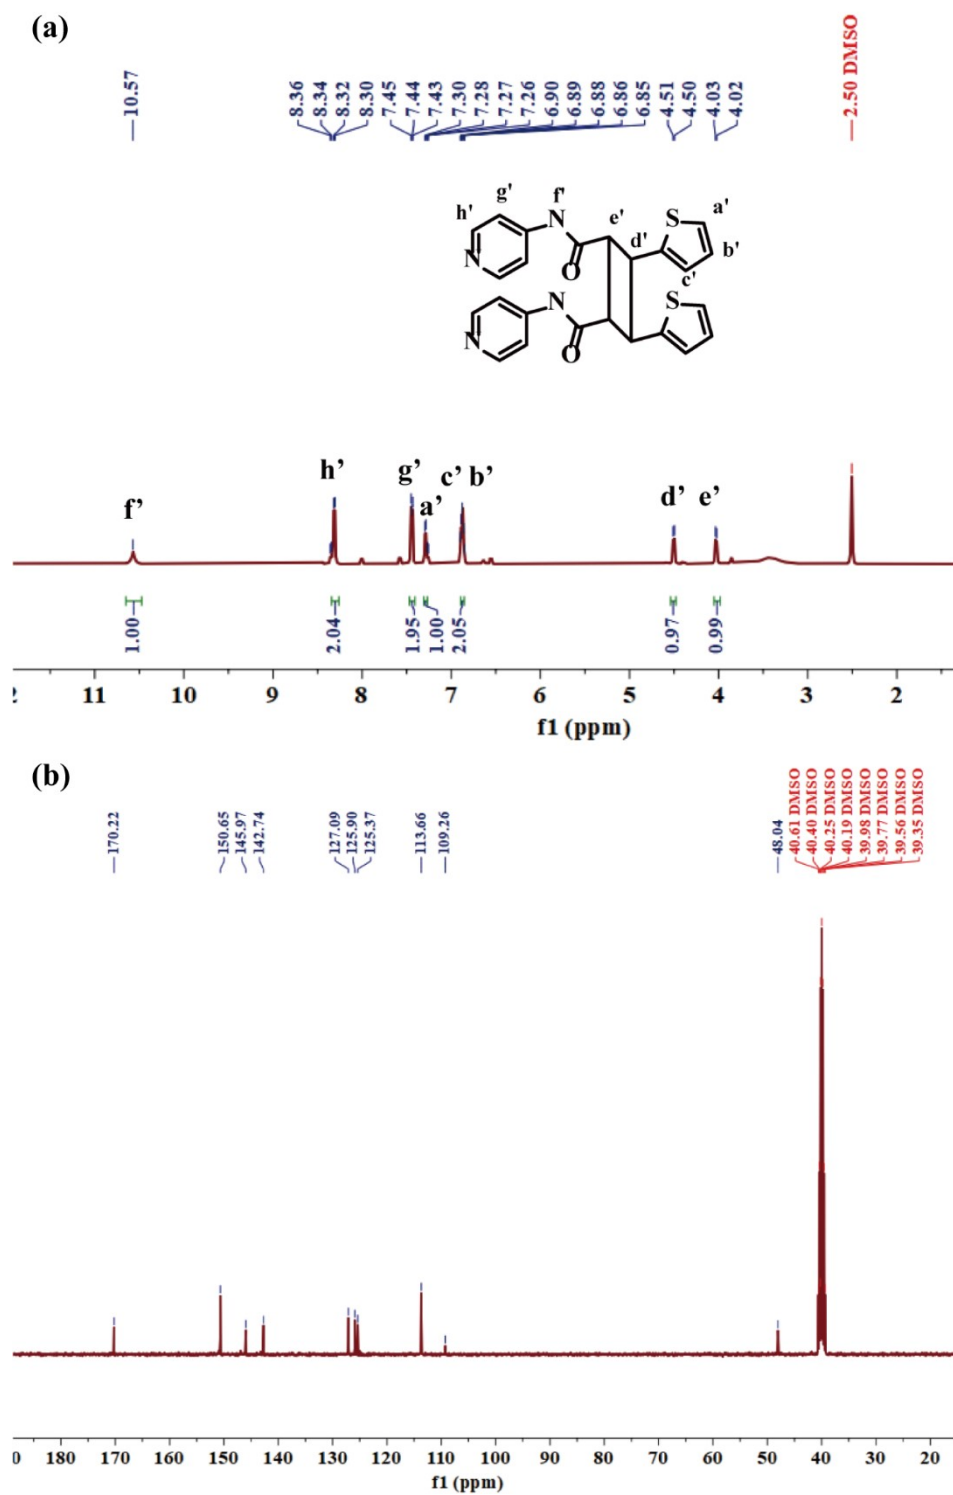

Fig. S9  $^1H$ -NMR spectrum (a) and  $^{13}C$ -NMR spectrum (b) of  $L_3$  in  $DMSO-d_6$ .

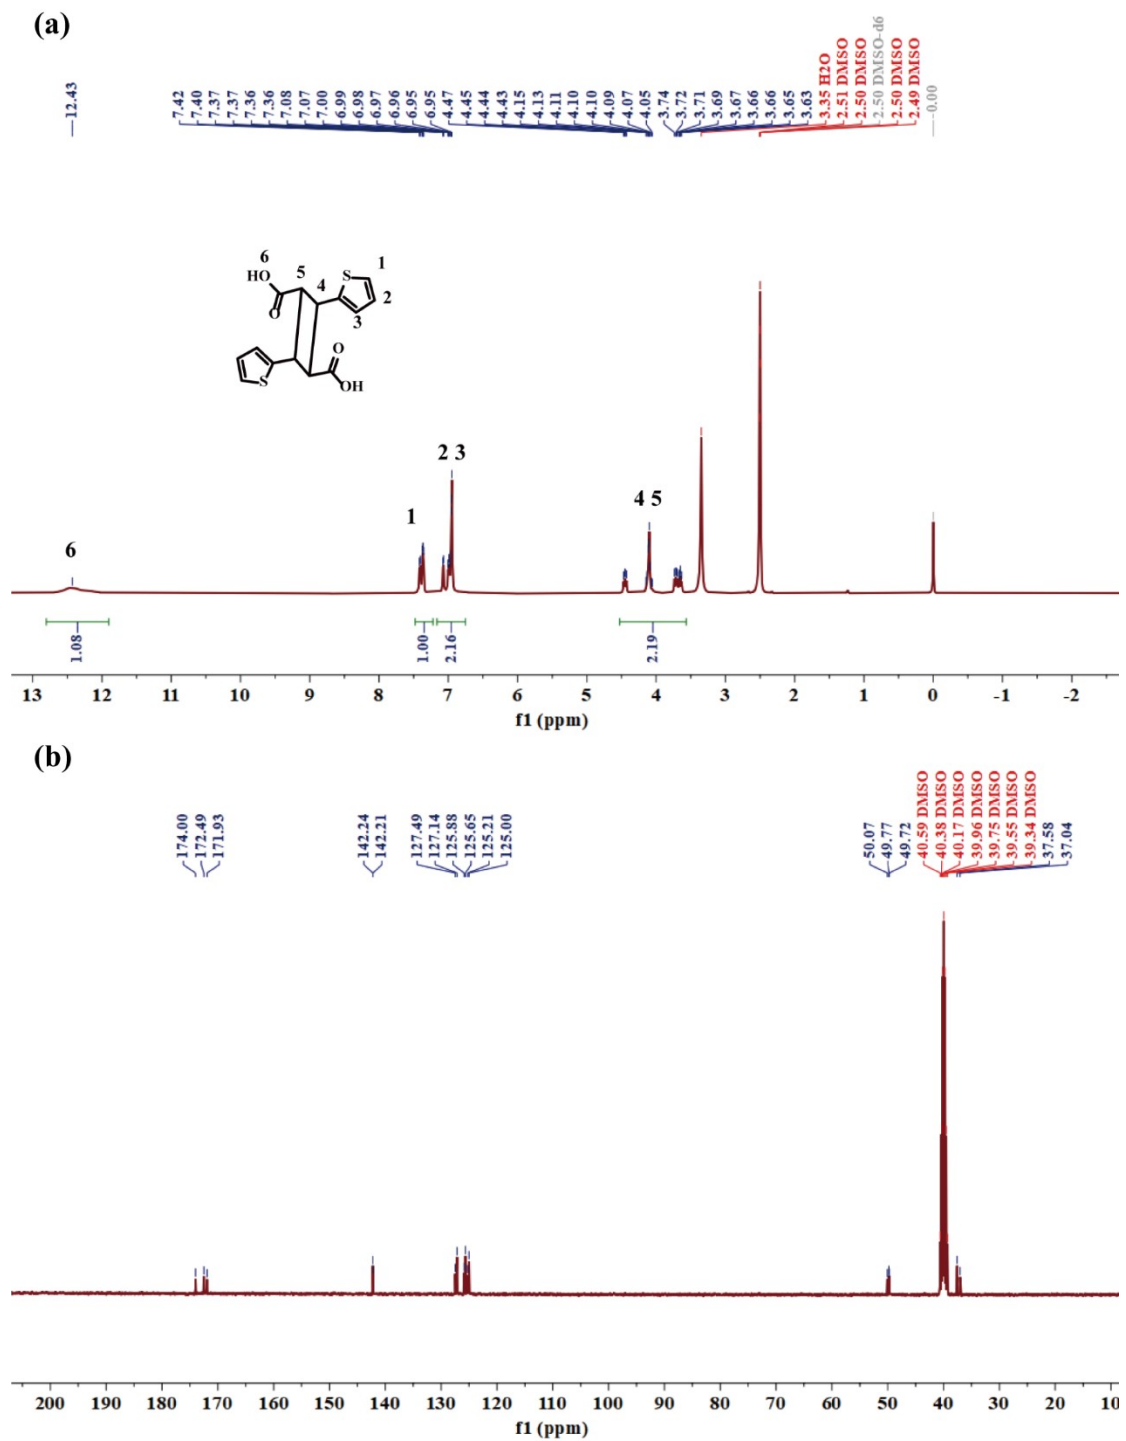

Fig. S10 <sup>1</sup>H-NMR spectrum (a) and <sup>13</sup>C-NMR spectrum (b) of **L<sub>2</sub>** in DMSO-*d*<sub>6</sub>.

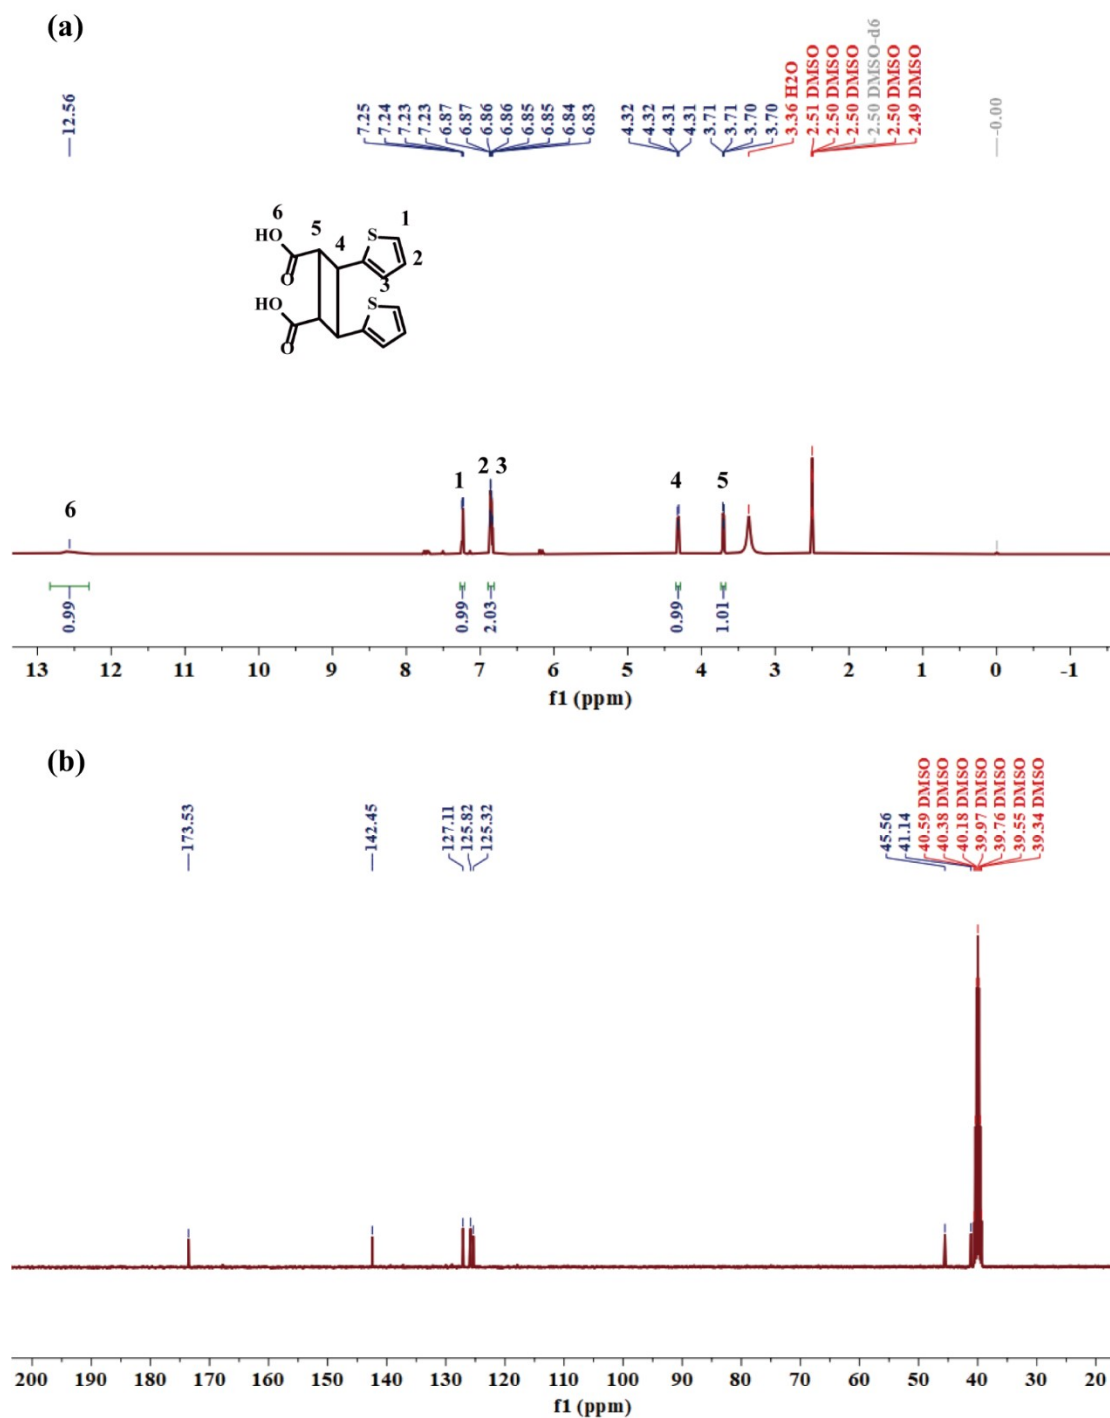

Fig. S11  $^1\text{H}$ -NMR spectrum (a) and  $^{13}\text{C}$ -NMR spectrum (b) of  $\text{L}_4$  in  $\text{DMSO-}d_6$ .

## Mass spectra

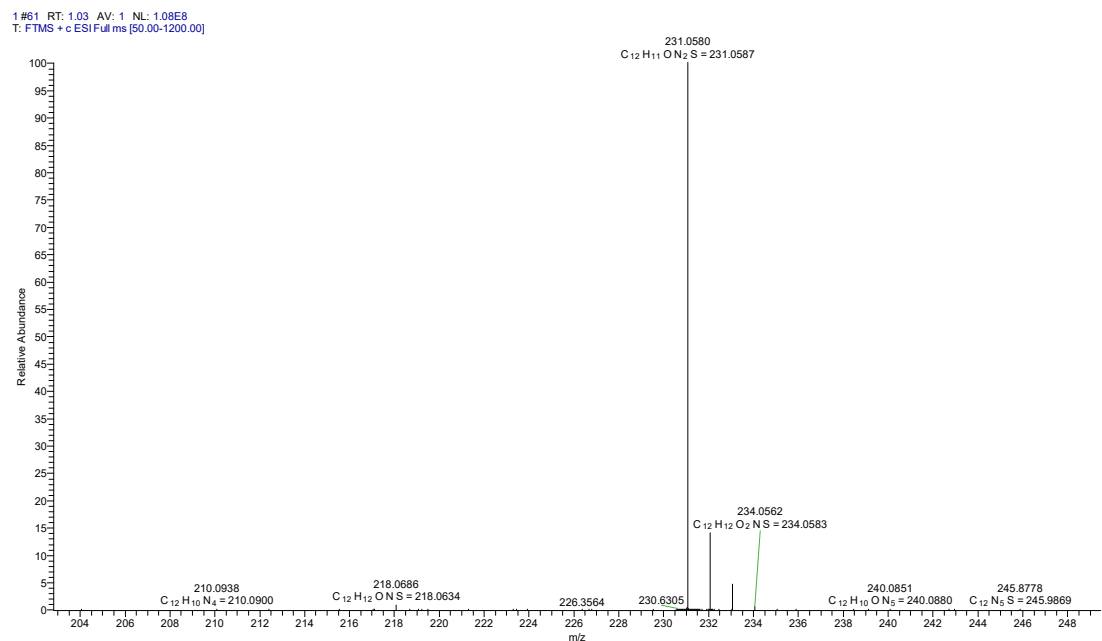

Fig. S12 Positive-ion ESI mass spectrum of **3-ptpa** in MeOH.

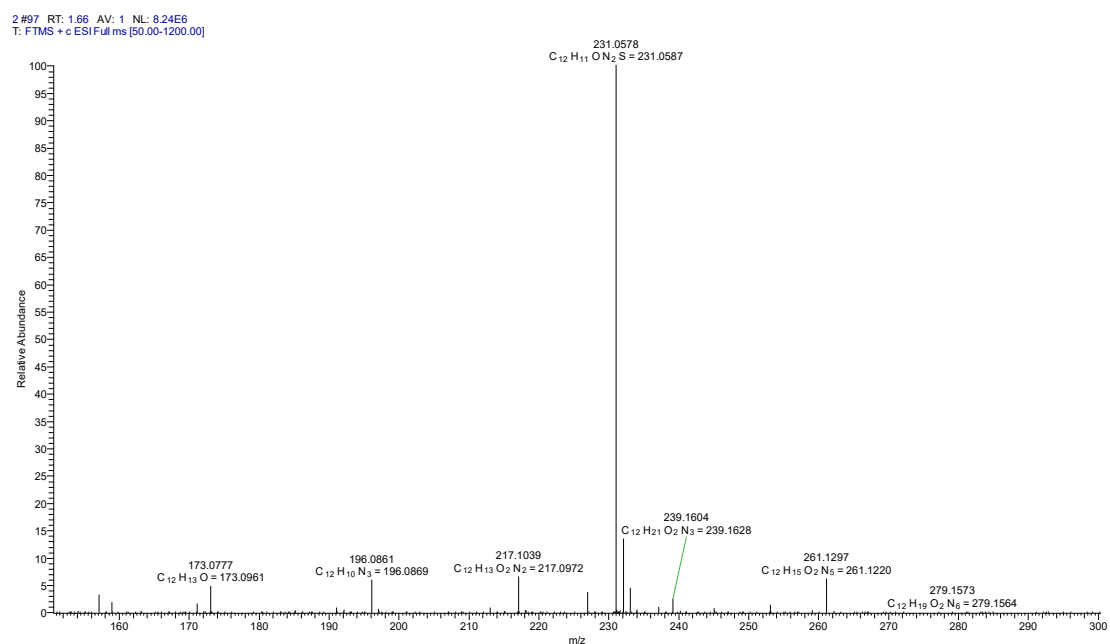

Fig. S13 Positive-ion ESI mass spectrum of **4-ptpa** in MeOH.

1 #53 RT: 1.00 AV: 1 NL: 8.02E7  
T: FTMS + c ESI Full ms [100.00-800.00]

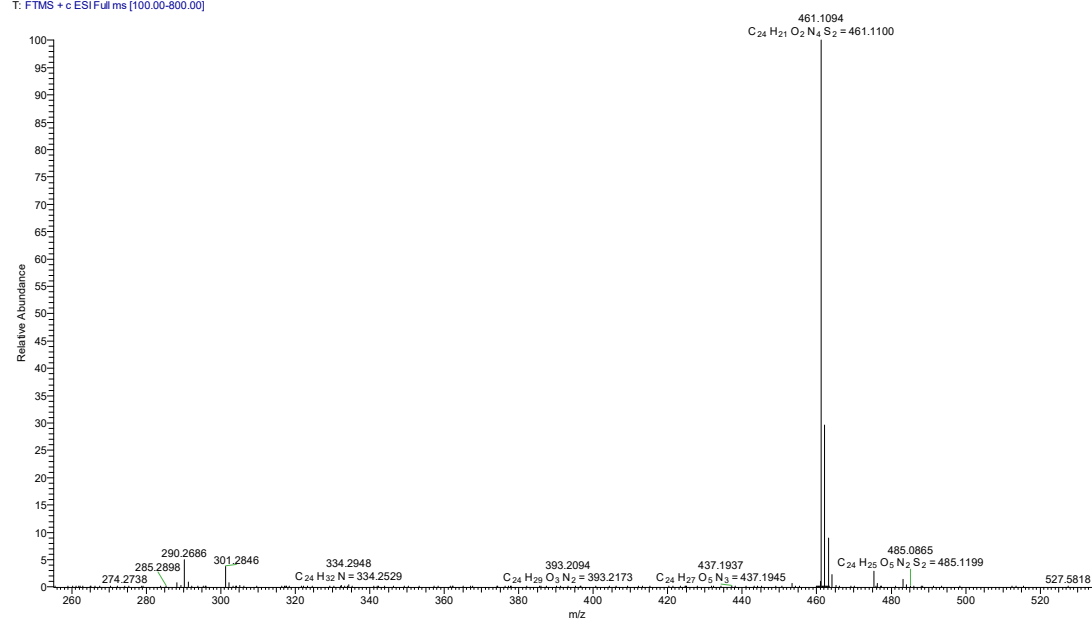

Fig. S14 Positive-ion ESI mass spectrum of  $L_1$  in MeOH.

2 #51 RT: 0.94 AV: 1 NL: 1.05E8  
T: FTMS + c ESI Full ms [100.00-800.00]

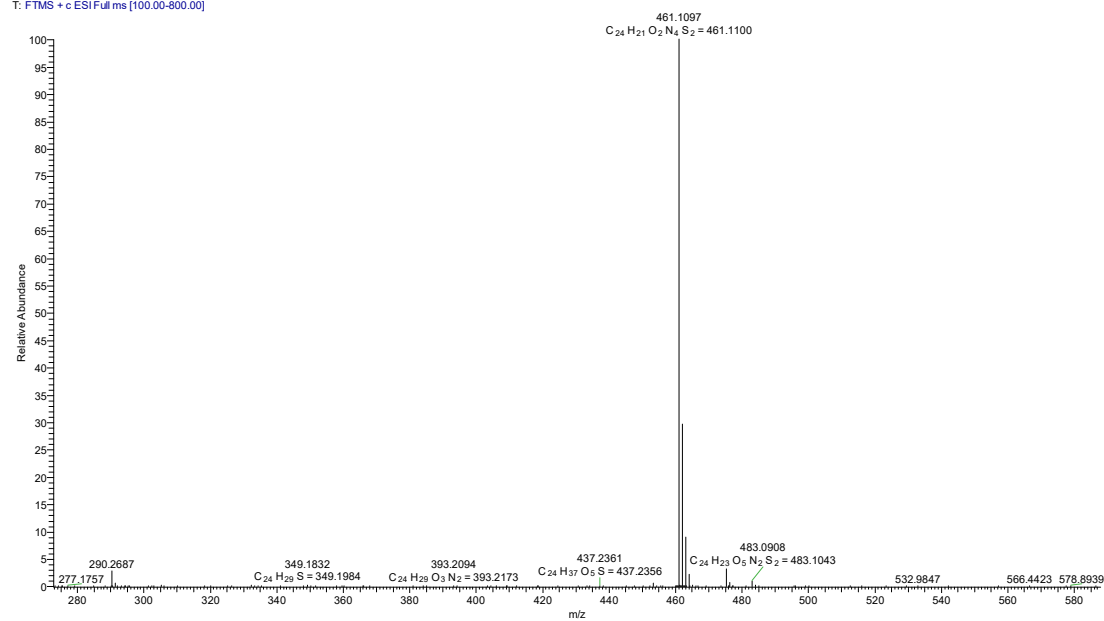

Fig. S15 Positive-ion ESI mass spectrum of  $L_2$  in MeOH.

3 #92 RT: 1.74 AV: 1 NL: 2.97E7  
T: FTMS + c ESI Full ms [100.00-2000.00]

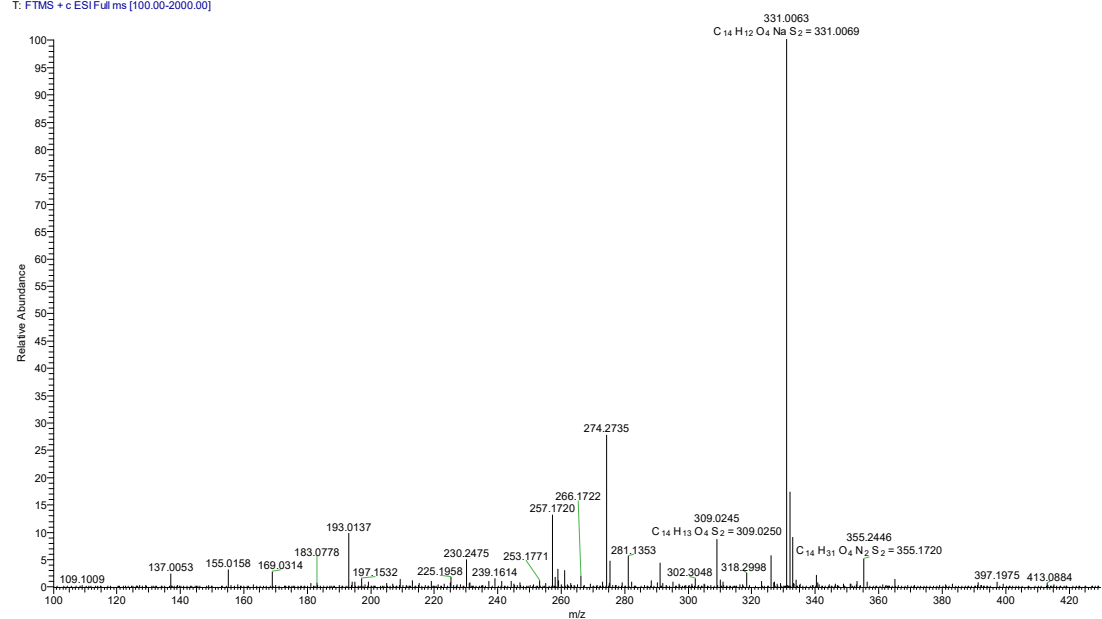

Fig. S16 Positive-ion ESI mass spectrum of L<sub>3</sub> in MeOH.

4\_230922153045 #59 RT: 1.05 AV: 1 NL: 4.38E7  
T: FTMS + c ESI Full ms [100.00-800.00]

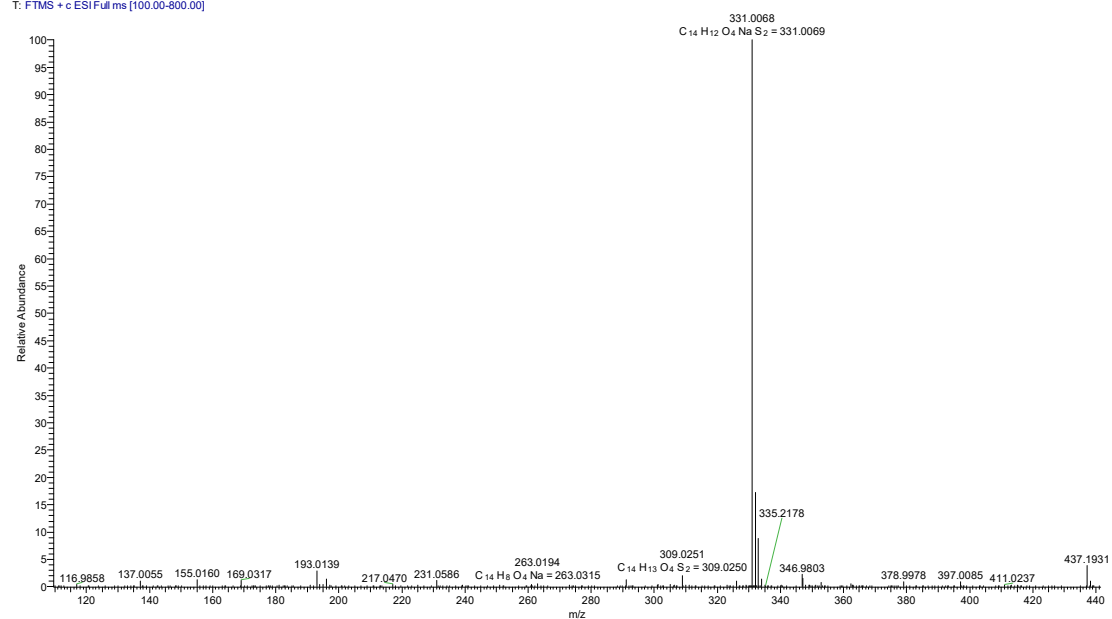

Fig. S17 Positive-ion ESI mass spectrum of L<sub>4</sub> in MeOH.

## IR spectra

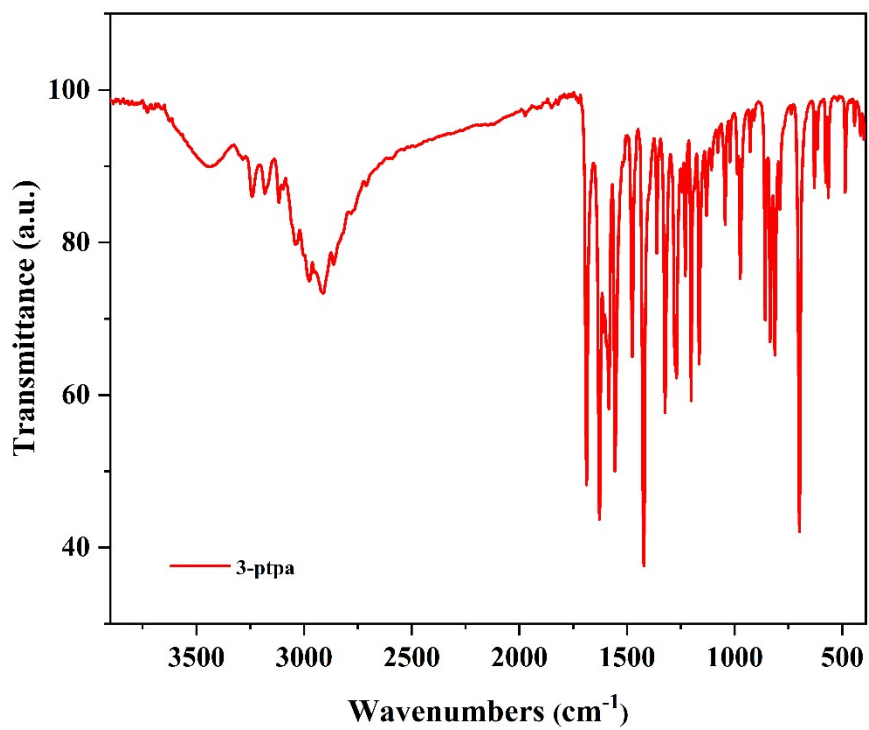

**Fig. S18** IR spectra of **3-ptpa**.



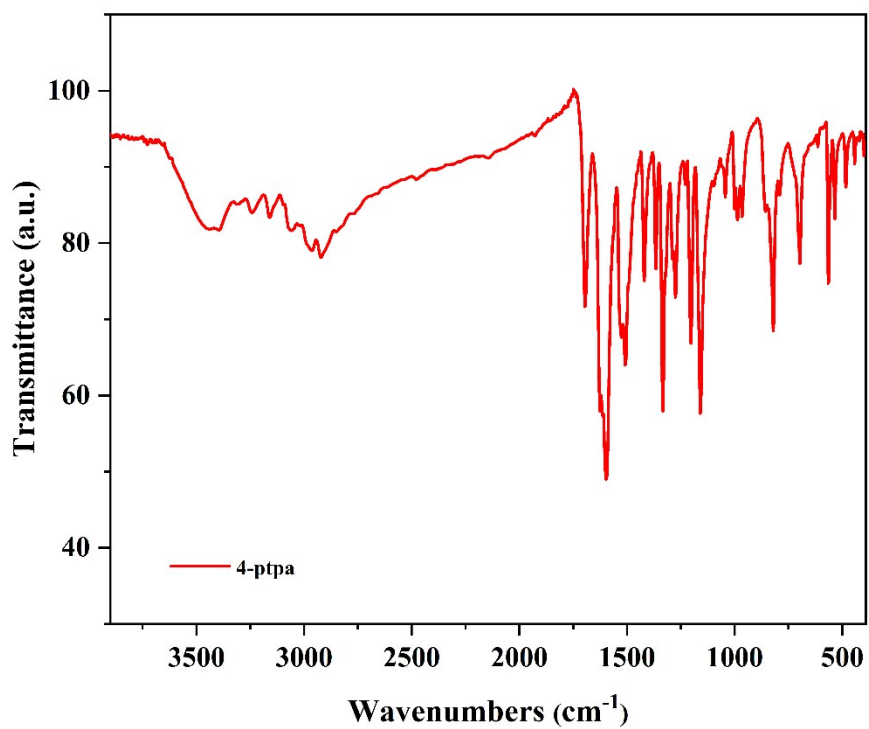

Fig. S19 IR spectra of 4-ptpa.

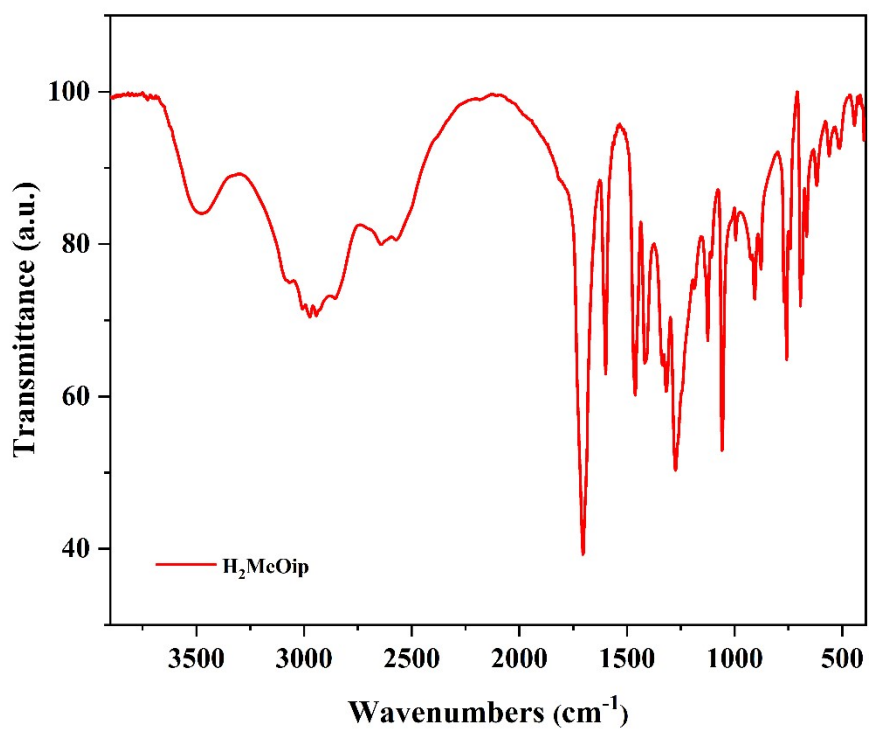

Fig. S20 IR spectra of H<sub>2</sub>MeOip.

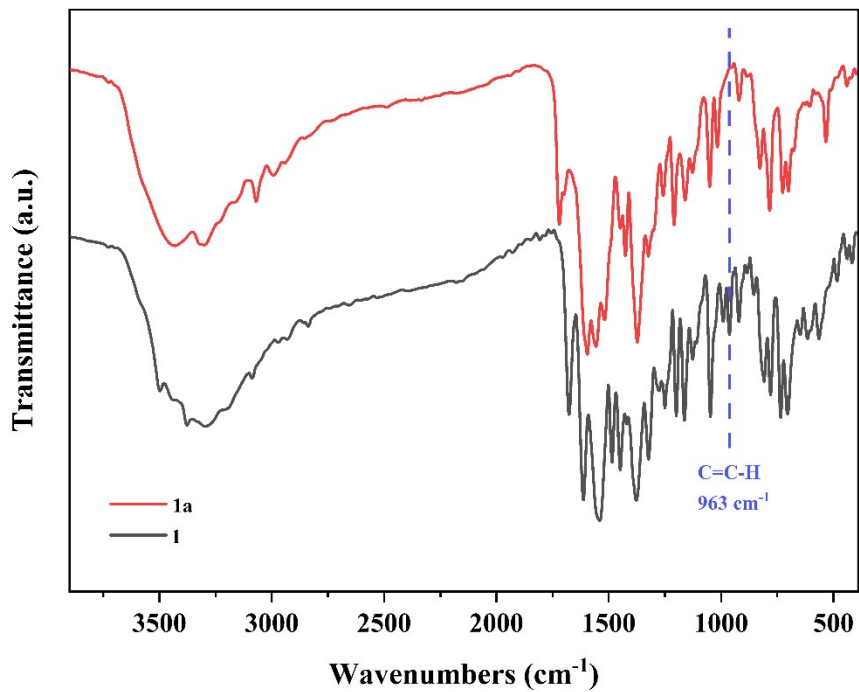

Fig. S21 IR spectra of 1 and 1a.

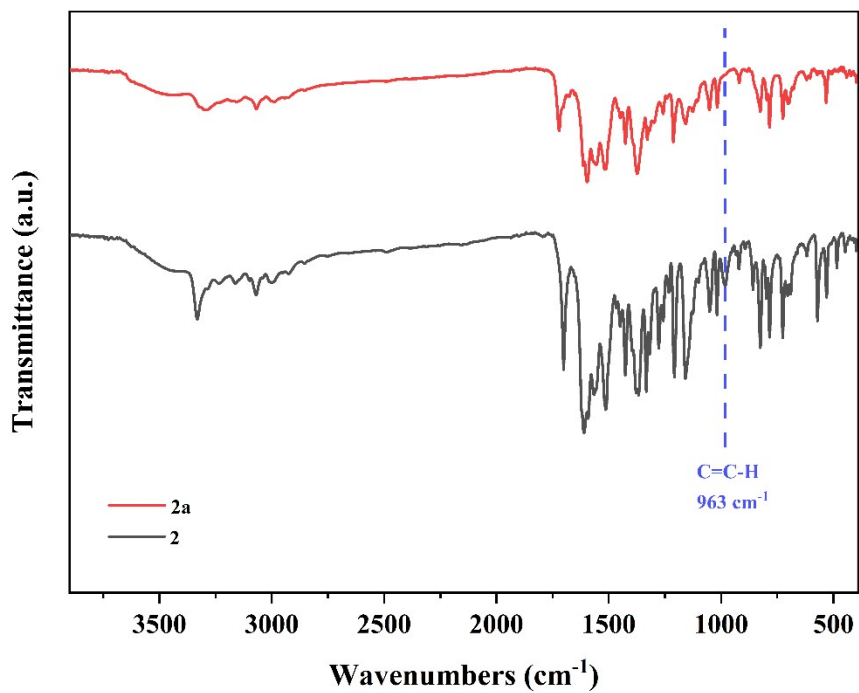

Fig. S22 IR spectra of **2** and **2a**.

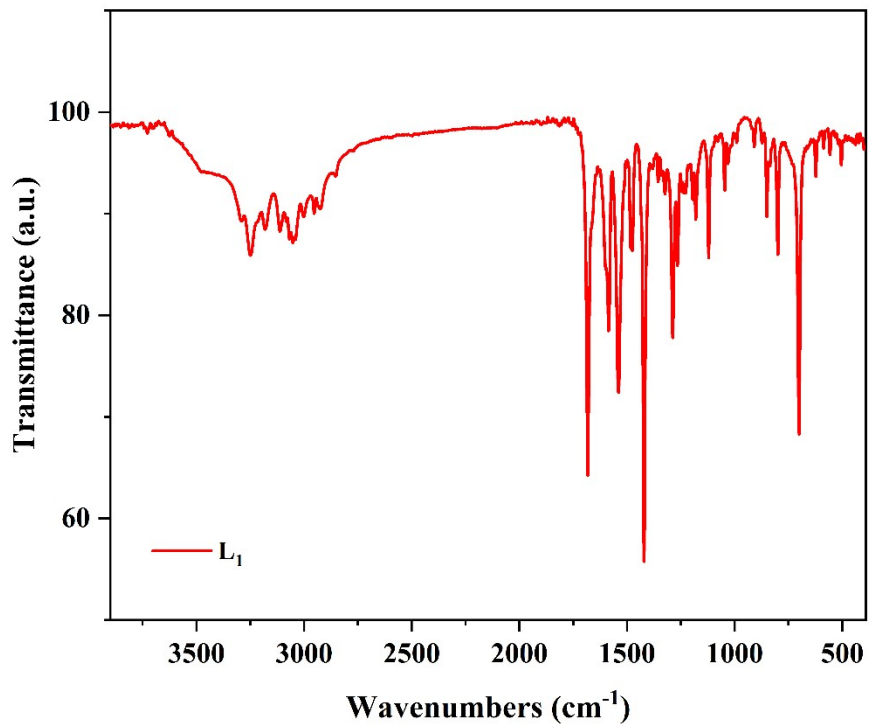

Fig. S23 IR spectra of L<sub>1</sub>.

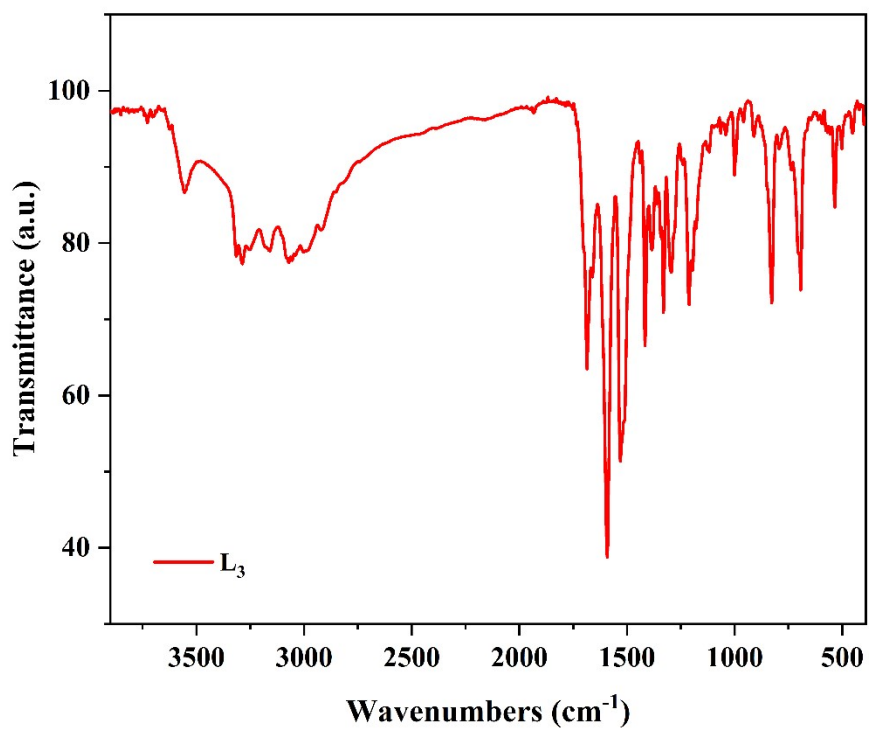

Fig. S24 IR spectra of L<sub>3</sub>.

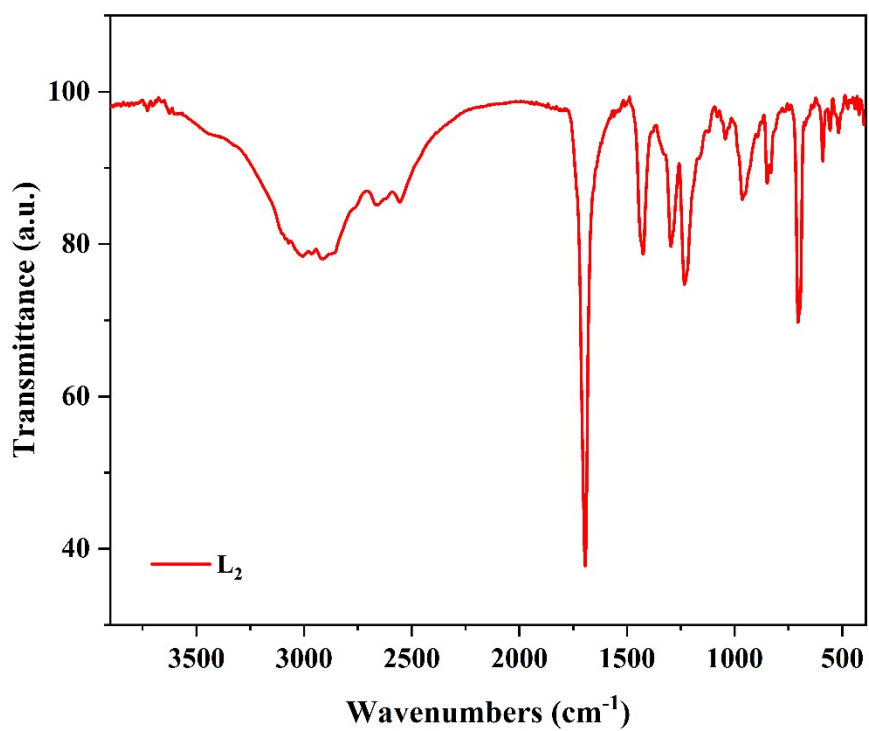

Fig. S25 IR spectra of L<sub>2</sub>.

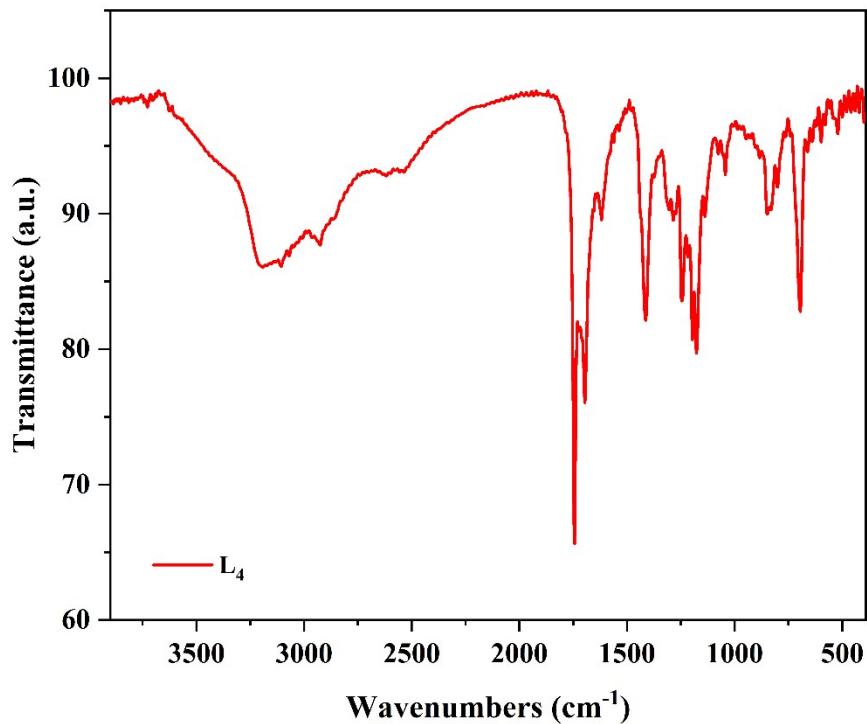

Fig. S26 IR spectra of L<sub>4</sub>.

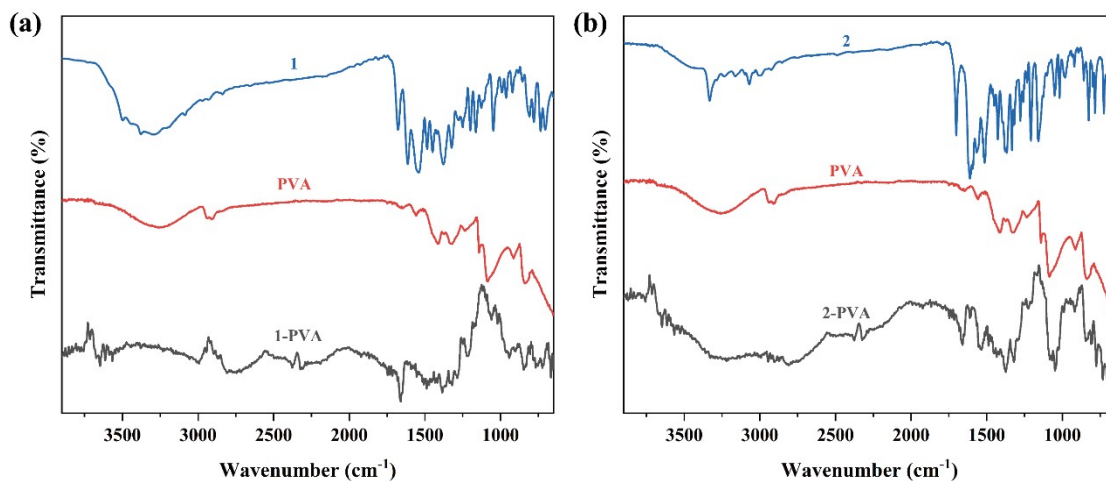

Fig. S27 IR spectra of 1-PVA (a) and 2-PVA (b).

## Thermo gravimetric analysis (TGA)

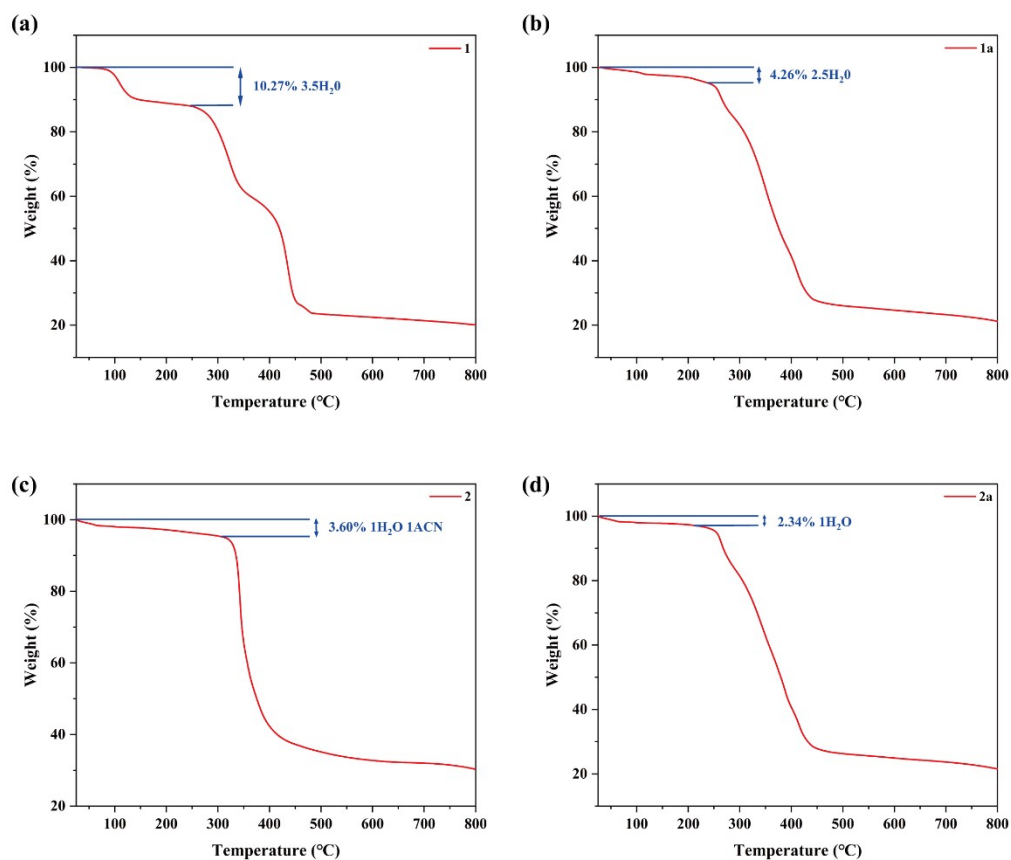

**Fig. S28** TGA of **1–2a**.

The results of single crystal data show that there are four coordination water molecules in **1a**. This can be attributed to the loss of water molecules caused by the evaporation of a part of the water molecules under ultraviolet light. Therefore, the number of water molecules calculated by the TGA is smaller than the number of water molecules observed in the crystal data. We respected the experimental results and wrote the molecular formula according to the conclusions.

## Solid-state UV-visible absorbance spectra

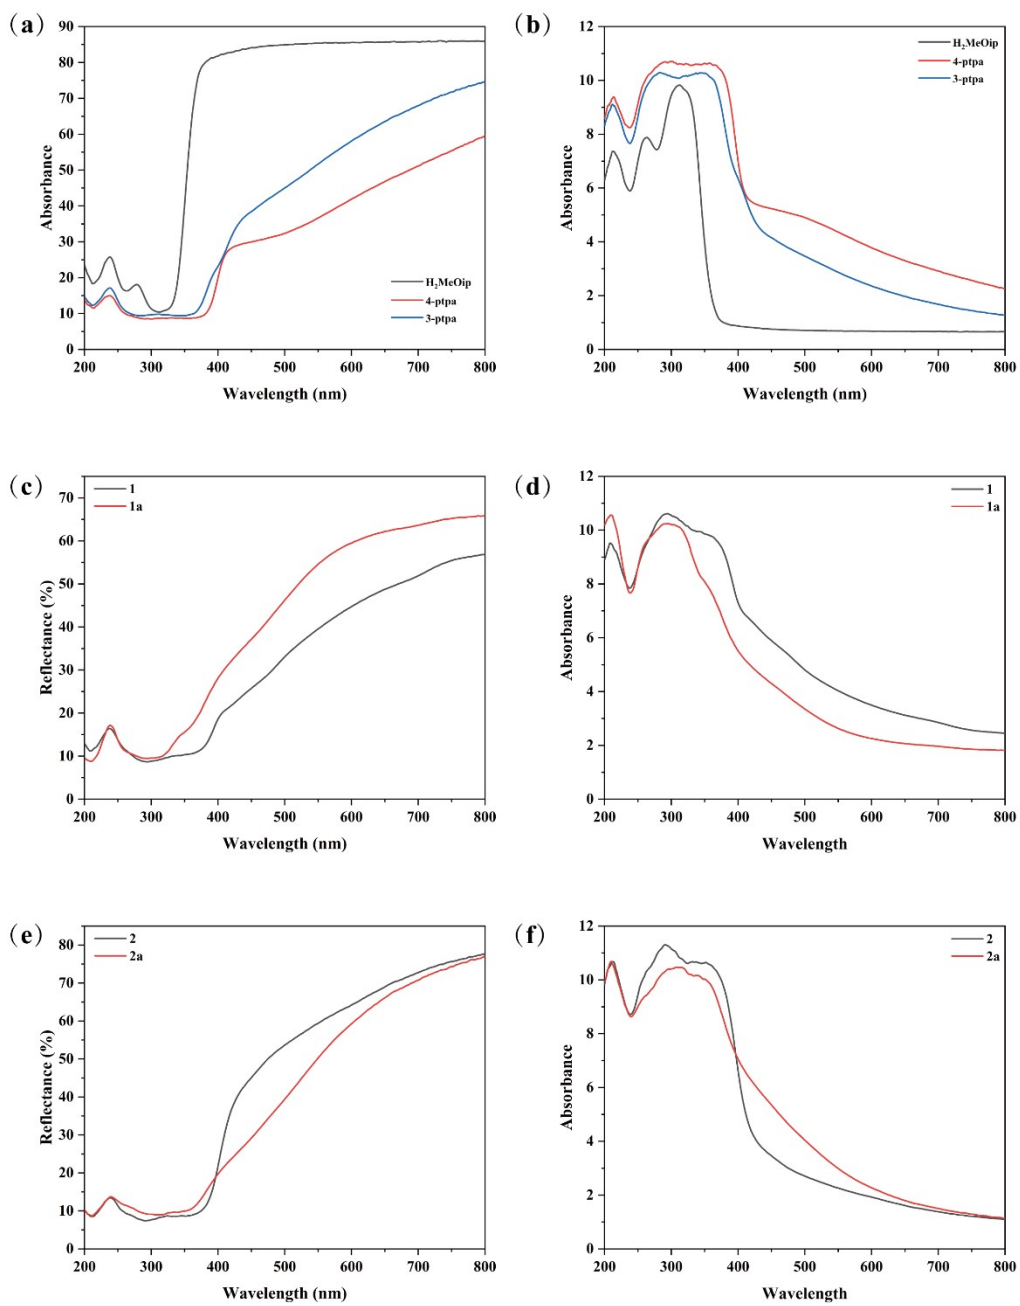

Fig. S29 Solid-state UV-visible absorbance.

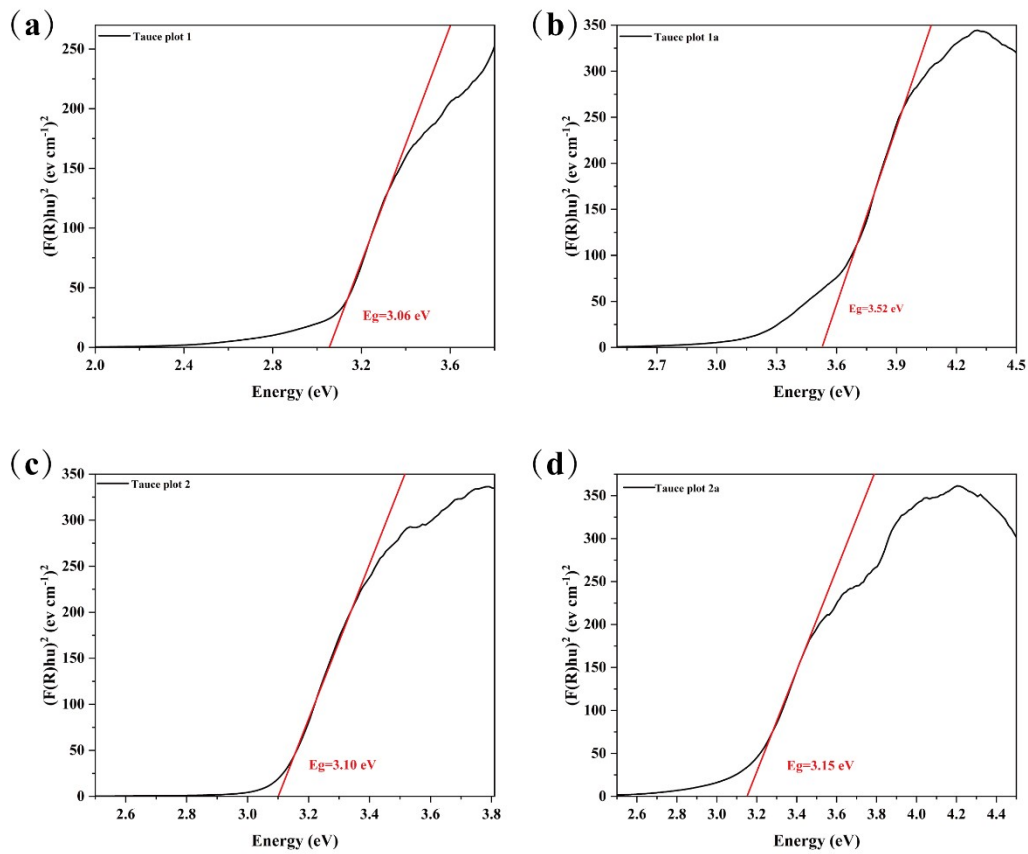

Fig. S30 the direct optical band gap.

### Scanning electron microscope

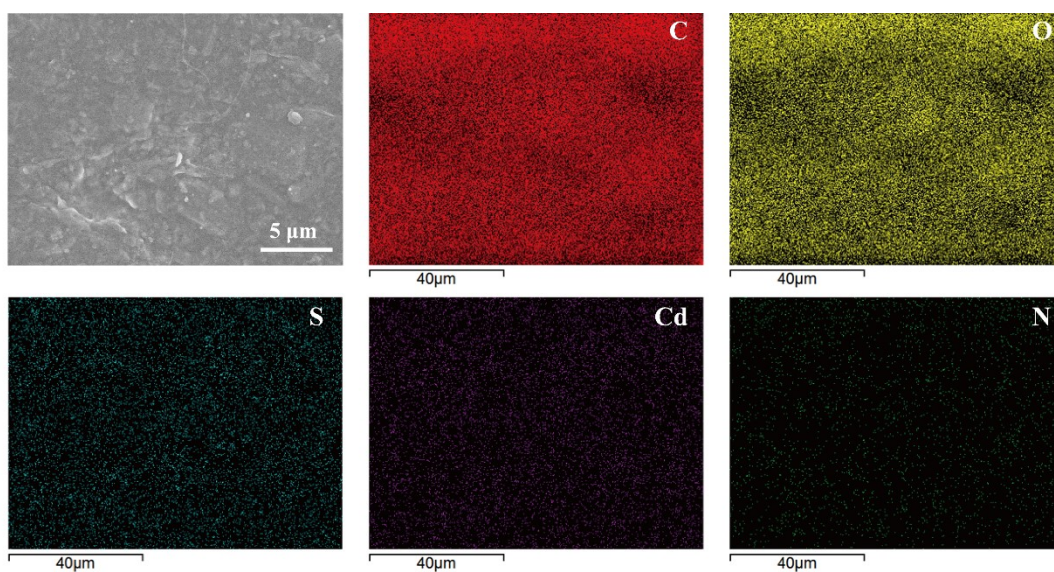

Fig. S31 SEM image and EDS mapping images of 1-PVA membrane.



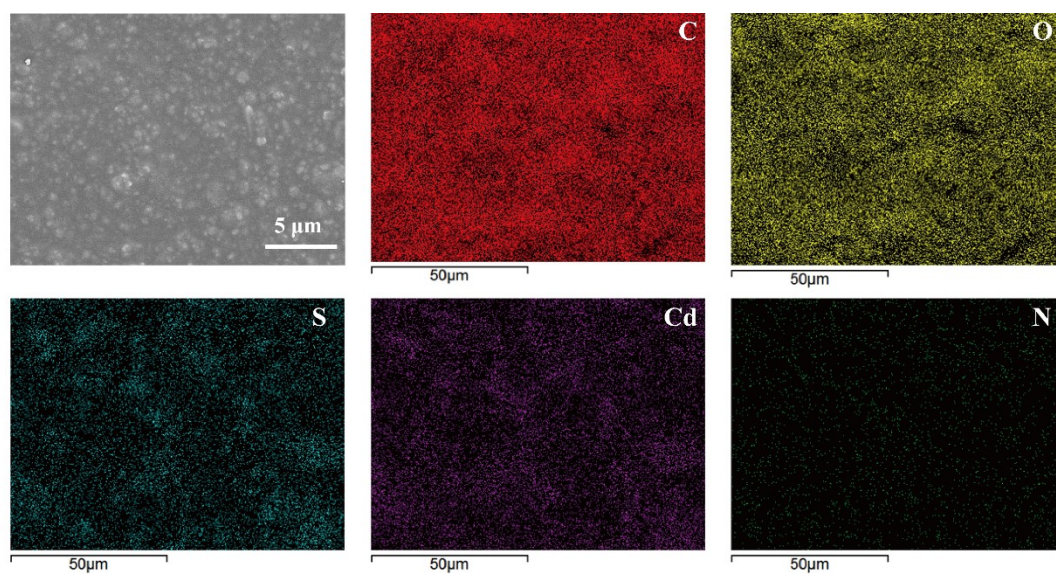

Fig. S32 SEM image and EDS mapping images of 2-PVA membrane.

### Photosolient Effects

Table S6 Single crystal data.

| Date (RT)             | 1     | 1b    | 1c    | 2     | 2a    |
|-----------------------|-------|-------|-------|-------|-------|
| $a$ (Å)               | 10.25 | 10.26 | 10.26 | 12.60 | 10.52 |
| $b$ (Å)               | 10.37 | 10.37 | 10.30 | 16.00 | 10.73 |
| $c$ (Å)               | 12.33 | 12.37 | 12.49 | 16.60 | 14.86 |
| $\alpha$ (°)          | 93    | 93    | 93    | 88    | 93    |
| $\beta$ (°)           | 101   | 102   | 102   | 89    | 96    |
| $\gamma$ (°)          | 118   | 119   | 118   | 85    | 106   |
| $V$ (Å <sup>3</sup> ) | 1106  | 1112  | 1121  | 3331  | 1594  |

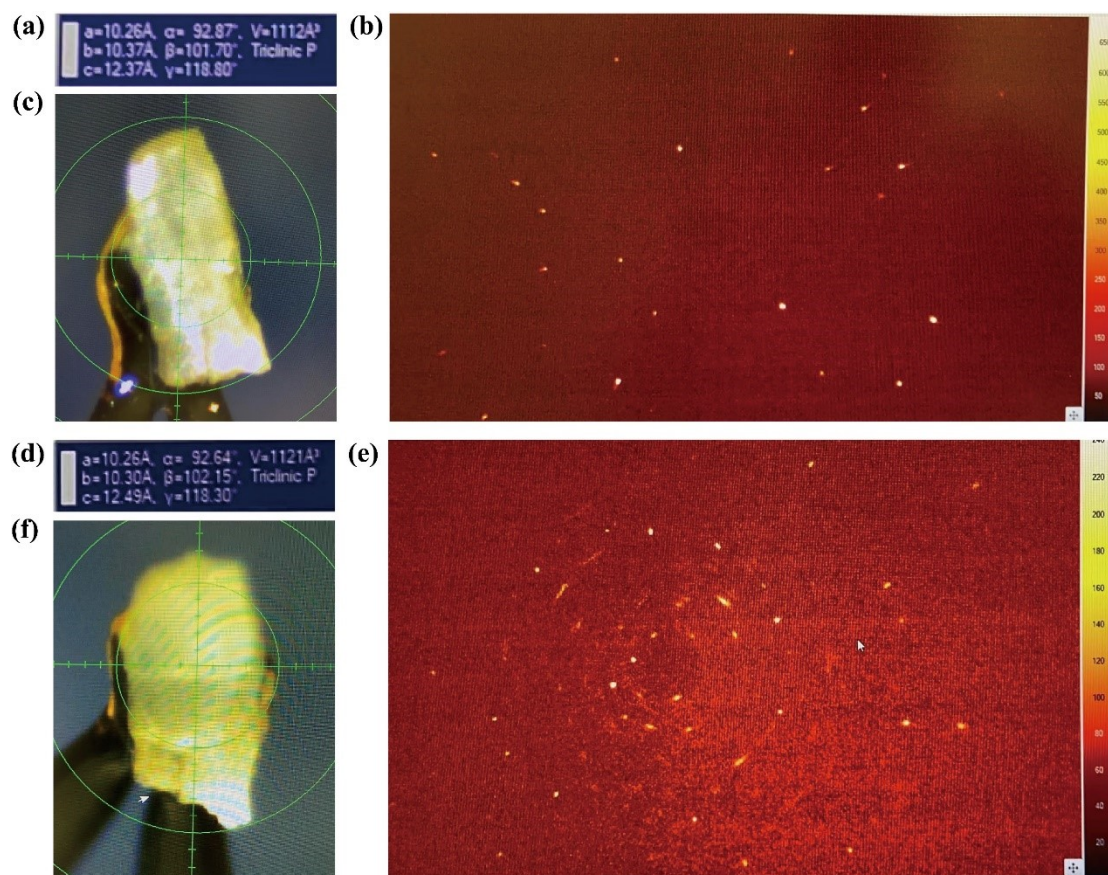

**Fig. S33** X-ray diffraction analysis of crystals **1b** and **1c**. (a)(d) Cell parameters for crystals **1b** and **1c**. (b)(e) Diffraction images of crystals **1b** and **1c**. (c)(f) Crystals of **1b** and **1c**.

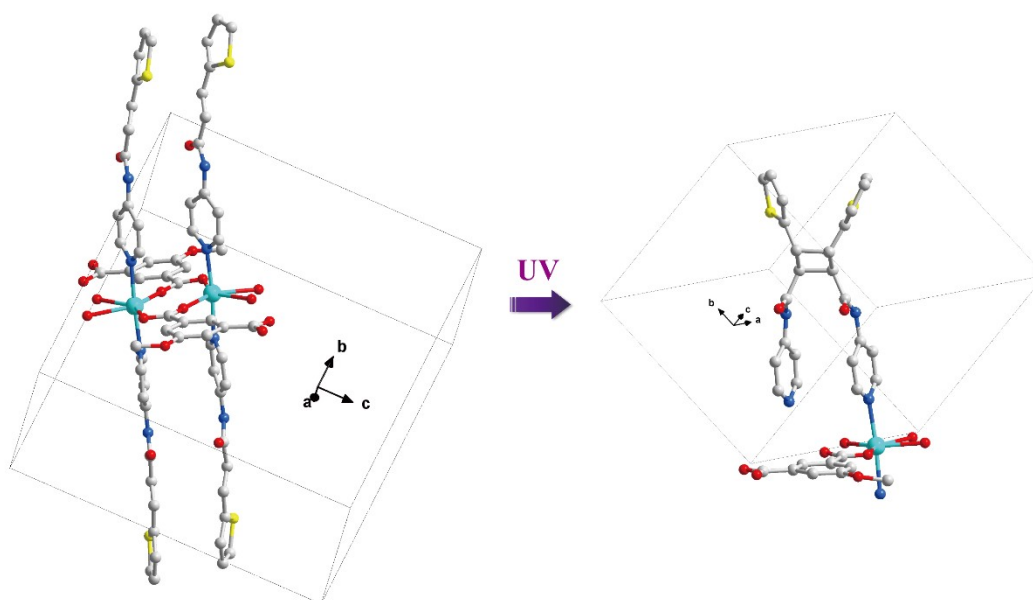

**Fig. S34** Under UV light, the single crystal **2** becomes crystal **2a**, and the cell volume shrinks twice.

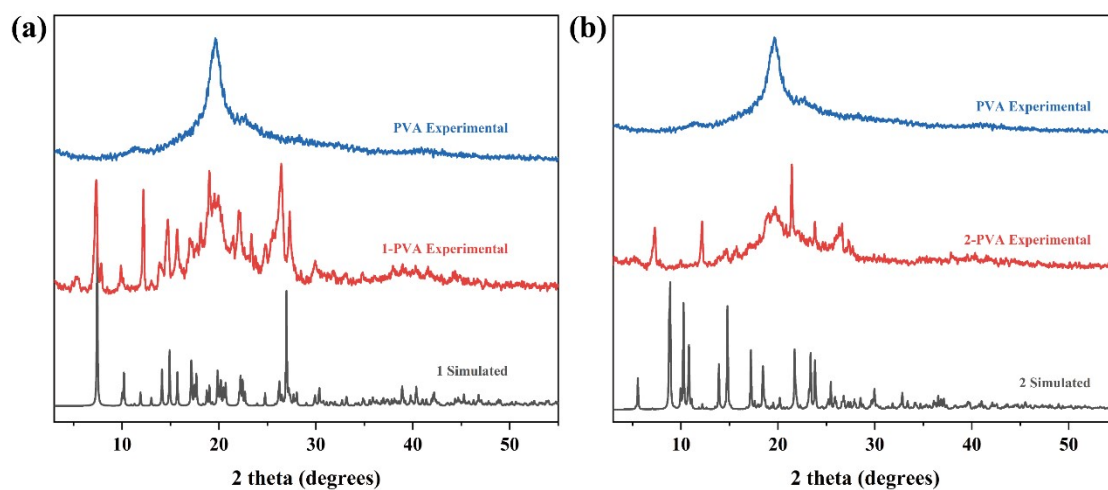

Fig. S35 PXR profile of 1-PVA membrane (a) and 2-PVA membrane (b).

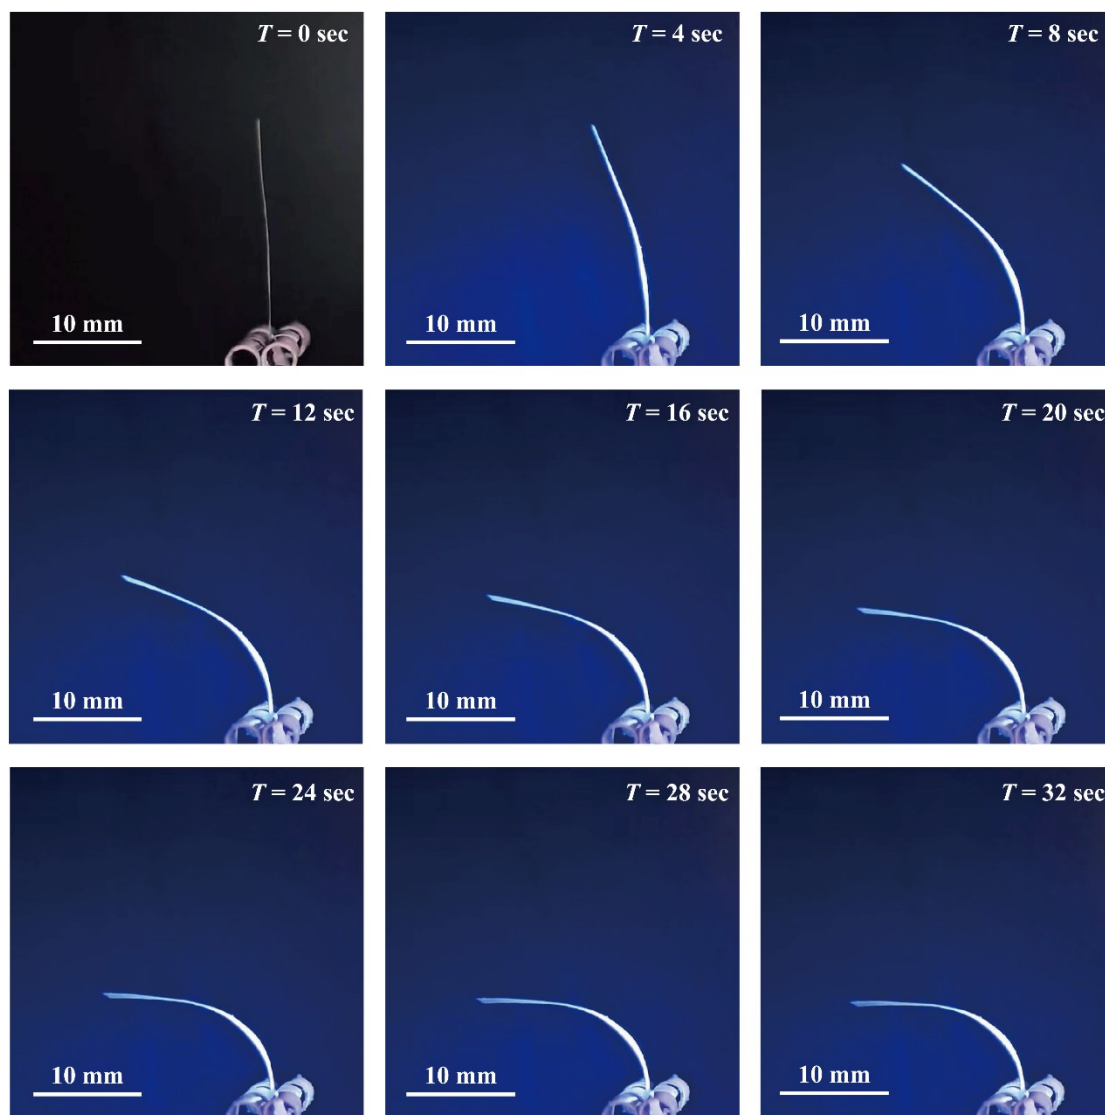

Fig. S36 Optical images of the composite membrane 1-PVA upon exposure to 365 nm light.



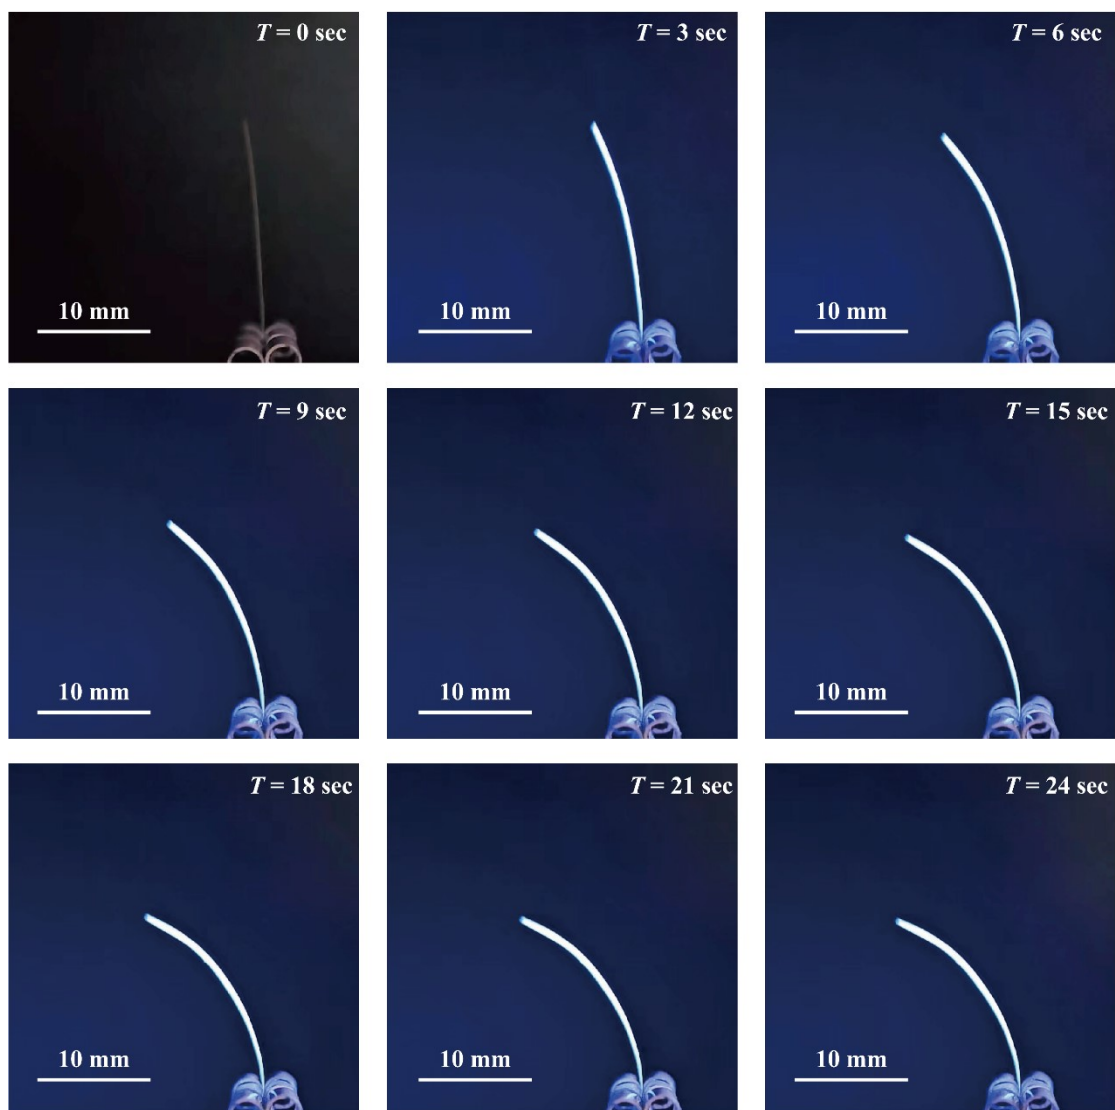

**Fig. S37** Optical images of the composite membrane 2-PVA upon exposure to 365 nm light.

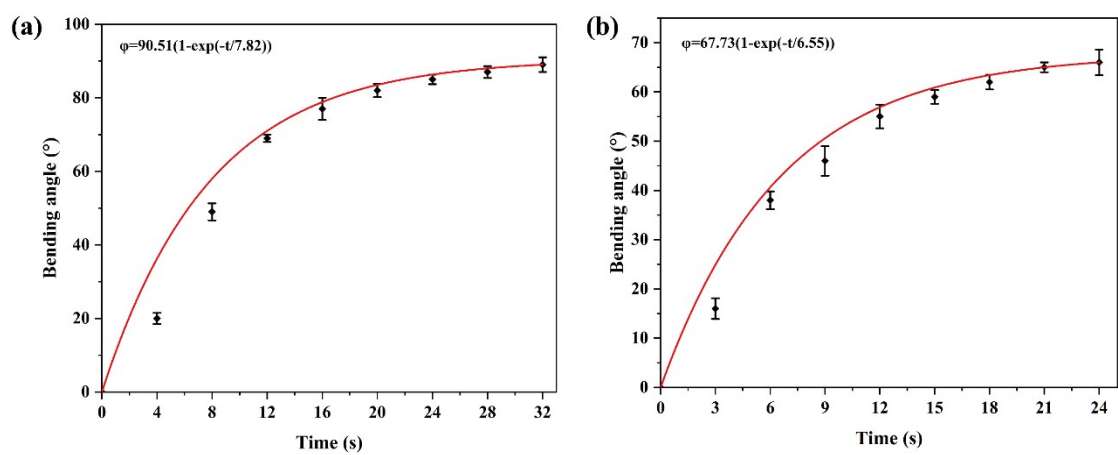

**Fig. S38** Curves of 1-pva (a) and 2-pva (b) bending against exposure time.

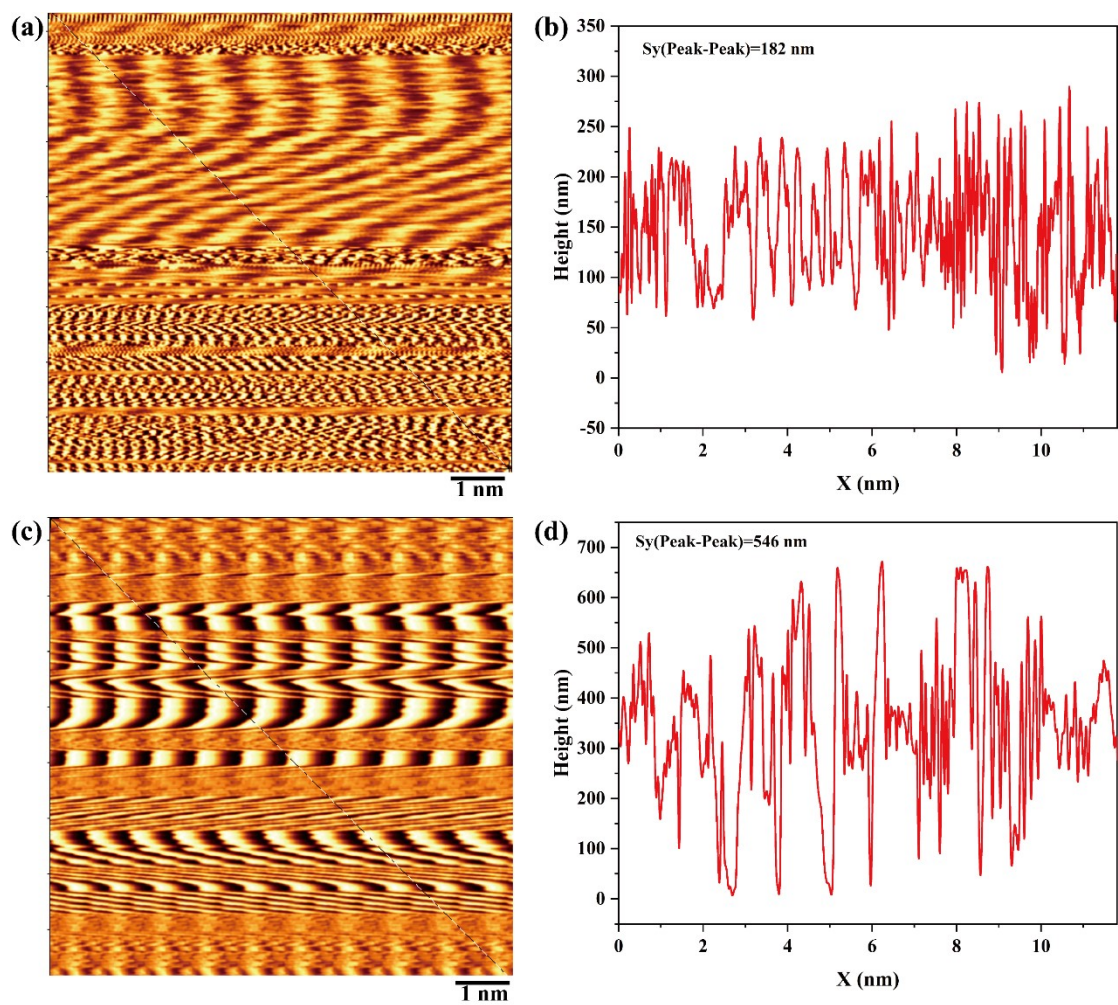

**Fig. S39** AFM images and the corresponding height profiles of a section of a line in **1-PVA** (a, b) and irradiated **1-PVA** membrane (c, d).

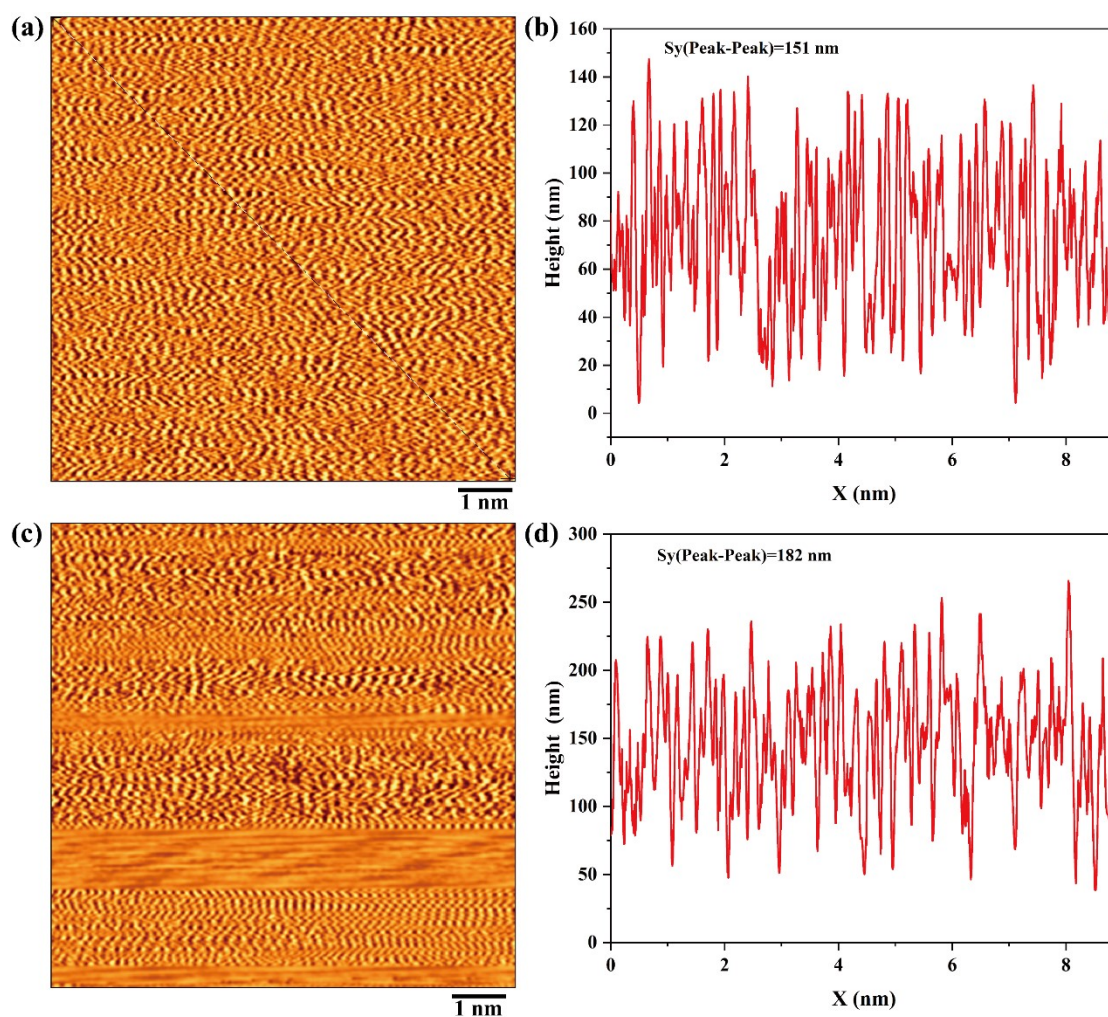

**Fig. S40** AFM images and the corresponding height profiles of a section of a line in **2-PVA** (a, b) and irradiated **2-PVA** membrane (c, d).

## References

1. R. Blessing, An empirical correction for absorption anisotropy, *Acta Crystallographica Section A*, 1995, **51**, 33-38.
2. G. Sheldrick, Crystal structure refinement with SHELXL, *Acta Crystallographica Section C*, 2015, **71**, 3-8.
3. O. V. Dolomanov, L. J. Bourhis, R. J. Gildea, J. A. K. Howard and H. Puschmann, OLEX2: a complete structure solution, refinement and analysis program, *Journal of Applied Crystallography*, 2009, **42**, 339-341.
4. R. W. Cheary and A. A. Coelho, A fundamental parameters approach to X-ray line-profile fitting, *J. Appl. Crystallogr.*, 1992, **25**, 109-121.
5. Bruker, TOPAS, Bruker AXS Inc., Karlsruhe, Germany, 7 edn., 2017.
